1 **Novel genes required for surface-associated motility in**

2 ***Acinetobacter baumannii***

3

4

5 Ulrike Blaschke <sup>a,b,\*</sup>, Evelyn Skiebe <sup>a</sup> and Gottfried Wilharm <sup>a,c,\*</sup>

6

7 <sup>a</sup> Robert Koch-Institute, Project group P2, Burgstr. 37, D-38855 Wernigerode,  
8 Germany

9 \* Corresponding addresses: [ulrikeblaschke@googlemail.com](mailto:ulrikeblaschke@googlemail.com); [WilharmG@rki.de](mailto:WilharmG@rki.de)

10 <sup>b</sup> ORCID: 0000-0002-3496-5447

11 <sup>c</sup> ORCID: 0000-0002-1771-6799

12

13

14 **Keywords**

15 *Acinetobacter baumannii*, surface-associated motility, transposon mutant library,  
16 pellicle biofilm, antibiotic resistance, *Galleria mellonella*

17

18 **Funding**

19 This project was funded by the Deutsche Forschungsgemeinschaft (DFG) within FOR  
20 2251 (WI 3272/3-1 and WI 3272/3-2).

21 **Abstract**

22 *Acinetobacter baumannii* is an opportunistic and increasingly multi-drug resistant  
23 human pathogen rated as a critical priority 1 pathogen for the development of new  
24 antibiotics by the WHO in 2017. Despite the lack of flagella, *A. baumannii* can move  
25 along wet surfaces in 2 different ways: via twitching motility and surface-associated  
26 motility. While twitching motility is known to depend on type IV pili, the mechanism of  
27 surface-associated motility is poorly understood. In this study we established a library  
28 of 30 *A. baumannii* ATCC 17978 mutants that displayed deficiency in surface-  
29 associated motility. By making use of natural competence we also introduced these  
30 mutations into strain 29D2 to differentiate strain-specific versus species-specific  
31 effects of mutations. Mutated genes were associated with purine/pyrimidine/folate  
32 biosynthesis (e.g. *purH*, *purF*, *purM*, *purE*), alarmone/stress metabolism (e.g. Ap4A  
33 hydrolase), RNA modification/regulation (e.g. methionyl-tRNA synthetase), outer  
34 membrane proteins (e.g. *ompA*), and genes involved in natural competence  
35 (*comEC*). All tested mutants originally identified as motility-deficient in strain ATCC  
36 17978 also displayed a motility-deficient phenotype in 29D2. By contrast, further  
37 comparative characterization of the mutant sets of both strains regarding pellicle  
38 biofilm formation, antibiotic resistance, and virulence in the *Galleria mellonella*  
39 infection model revealed numerous strain-specific mutant phenotypes. Our studies  
40 highlight the need for comparative analyses to characterize gene functions in  
41 *A. baumannii* and for further studies on the mechanisms underlying surface-  
42 associated motility.

## 43 Introduction

44 *Acinetobacter baumannii* is a Gram-negative and strictly aerobic coccobacillus [1,2].  
45 Being an opportunistic human pathogen [3], *A. baumannii* is associated with  
46 nosocomial diseases including soft tissue, bloodstream, and urinary tract infections  
47 as well as pneumonia [2]. Worldwide, about 9% of culture-positive infections found in  
48 intensive care units arise from *Acinetobacter spp.* [4]. Increased multi-drug resistance  
49 in *A. baumannii* has become problematic in recent years [5,6]. A global surveillance  
50 study found that 44% of 18,741 collected isolates were multi-drug resistant. During  
51 the study period the proportion of multi-drug resistant *A. baumannii* isolates  
52 increased from 23% in 2004 to 63% in 2014 [7]. As a consequence of rising multi-  
53 drug resistance, *A. baumannii* was rated as one of the critical priority 1 pathogens for  
54 the development of new antibiotics by the WHO in 2017 [8]. Drug resistance and  
55 environmental persistence have enabled *A. baumannii* to successfully establish in the  
56 hospital environment. Some clinical isolates can survive 100 days or more under dry  
57 conditions [9-13]. An important factor for the interaction of *A. baumannii* with biotic or  
58 abiotic surfaces is the formation of biofilms, a feature that is associated with an  
59 increased tolerance to desiccation stress [14].

60 A connection between *A. baumannii* virulence and motility has been shown in  
61 the *Caenorhabditis elegans* infection model where hypermotility resulted in increased  
62 virulence [15]. Although *A. baumannii* does not produce flagella, it is capable of  
63 moving in two different ways: via twitching motility and surface-associated motility.  
64 For *A. baumannii*, twitching motility has been shown to depend on type IV pili (T4P)  
65 [16,17] which drive the bacteria via retraction of attached T4P [18-25]. Inactivation of  
66 the putative T4P retraction ATPase *pilT* reduces twitching motility [26-28,11] but does  
67 not abolish surface-associated motility [26,16]. Surface-associated motility in *A.*

68 *baumannii* occurs at the surface of semi-dry media and is independent of T4P  
69 [26,29]. Surface-associated motility is poorly understood mechanistically, but was  
70 demonstrated to be controlled by quorum sensing [26], light [30], and iron availability  
71 [31,32]. Also, the synthesis of 1,3-diaminopropane (DAP) [33] and lipopolysaccharide  
72 (LPS) production [32] were shown to contribute to surface-associated motility of *A.*  
73 *baumannii*. Several genes have been identified which contribute to *A. baumannii*'s  
74 capacity for surface-associated motility [26,32], including a ribonuclease T2 family  
75 protein [34] and the superoxide dismutase SodB [35]. A recent study revealed the  
76 regulatory control of surface-associated motility and biofilm formation by a cyclic-di-  
77 GMP signaling network in *A. baumannii* strain ATCC 17978 [36]. Interestingly,  
78 studies on phase-variable phenotypes in *A. baumannii* strain AB5075 showed that  
79 “opaque phase” bacterial colonies had improved surface-associated motility [37,38].  
80 A correlation between pellicle biofilm formation and surface-associated motility has  
81 been described in *A. baumannii* [39]. Given the fact that many *A. baumannii* clinical  
82 isolates exhibit surface-associated motility, it could be an important trait associated  
83 with infection [33,28,26].

84 To investigate the mechanisms underlying surface-associated motility, we utilized a  
85 previously generated transposon mutant library of ATCC 17978 [33] which we  
86 screened for a surface-associated motility-deficient phenotype. The motility-deficient  
87 mutations were found to affect purine/pyrimidine/folate biosynthesis, alarmone/stress  
88 metabolism, RNA modification/regulation, outer membrane proteins, and DNA  
89 modification. We characterized these mutants with respect to growth, pellicle biofilm  
90 formation, antibiotic resistance, and virulence in the *Galleria mellonella* infection  
91 model. To facilitate distinguishing between strain-specific and species-specific traits

92 some mutations were also introduced into the naturally competent *A. baumannii*  
93 strain 29D2 [40].

94

## 95 **Materials and Methods**

### 96 **Bacterial strains and culture conditions**

97 *A. baumannii* strain ATCC 17978 was purchased from LGC Promochem. The  
98 *A. baumannii* strain 29D2 was isolated from a white stork [40] and is naturally  
99 competent [41]. All strains were grown at 37°C in Luria-Bertani (LB) broth or on LB  
100 agar, and mutants were supplemented with 50 µg/mL of kanamycin. All strains used  
101 in this work are listed in supplementary Table S1. Single colonies were used as  
102 inoculum for overnight cultures or motility plates. Neither strain ATCC 17978 nor  
103 strain 29D2 exhibited phase variation [38,37,42].

104

### 105 **Bacterial transformation and generation of an *A. baumannii* mutant library**

106 ATCC 17978 transposon mutants were generated using the EZ-Tn5™ <KAN-2>  
107 Insertion Kit (Epicentre Biotechnologies) as previously described [33]. Transformation  
108 of the transposome complex into ATCC 17978 was performed by electroporation  
109 [43]. 29D2 mutants were generated by making use of the strain's ability for natural  
110 competence. The transforming DNA was isolated from the ATCC 17978 mutants  
111 described above. A suspension of DNA-accepting bacteria was generated by  
112 resuspending a few colonies in 100 µL of sterile PBS. The bacterial suspension was  
113 then mixed with equal volumes of the transforming DNA (~400 ng/µL). This mixture  
114 was stabbed into motility agar plates 10 times, pipetting 2 µL of the mixture with each

115 stabbing [16]. The motility plates were incubated for 18 h at 37°C. After incubation,  
116 the bacteria were flushed off the motility plates with 1 mL of sterile PBS and 100 µL  
117 was plated on selective agar plates (50 g/mL of kanamycin). After sub-culturing of  
118 selected colonies transformation was confirmed by PCR.

119

## 120 **Identification of transposon insertion sites by single-primer PCR**

121 To identify the transposon insertion sites of ATCC 17978 motility mutants, single-  
122 primer PCR was performed as described previously [33] using one of the following  
123 primers: FP-2Kana 5'-CTTCCCGACAACGCAGACCG-3'; FP-3Kana 5'-  
124 GAGTTGAAGGATCAGATCACGC-3'; RP-2Kana 5'-  
125 CCCTTGTATTACTGTTTATGTAAGC-3'; RP-3Kana 5'-  
126 CGCGGCCTCGAGCAAGACG-3'; Tn5-Kana-For4 5'-  
127 GTTTTCTCCTTCATTACAGAAACG-3'; and Tn5-Kana-Rev4 5'-  
128 CCCATACAATCGATAGATTGTCG-3'. Transposon insertions of all mutants (ATCC  
129 17978 and 29D2) were confirmed by PCR using primers for the EZ-Tn5™ <KAN-2>  
130 kanamycin cassette (Suppl. Fig. S1), which are specified in the manufacturer's  
131 instructions, and appropriate gene target site primers (Suppl. Table S2; Suppl. Figs.  
132 S2 and S3).

133

## 134 **Surface-associated motility**

135 Motility assays were performed as described previously [33]. A single bacterial colony  
136 from a nutrient agar plate (Oxoid) or selective agar plates (supplemented with 50  
137 µg/mL of kanamycin for the mutants) of either wildtype (ATCC 17978 and 29D2) or  
138 mutants was lifted with a pipette tip and transferred to the surface of a motility plate

139 (0.5% agarose). Plates were incubated for 16 h at 37°C. The diameter of the surface  
140 motility spreading zone was measured and quadruplicates were statistically  
141 analyzed.

142

### 143 **Bacterial growth curves**

144 Growth curves were determined by growing overnight cultures at 37°C in LB medium  
145 (supplemented with 50 µg/mL of kanamycin for the mutants). Overnight cultures were  
146 adjusted to 1 OD (600 nm) in LB medium. In 250 mL baffled flasks, 50 mL of LB  
147 medium (without antibiotics) was inoculated with 1 mL of the OD-adjusted inoculum.  
148 The cultures were incubated at 37°C for 9 h with shaking at 160 rpm. OD  
149 measurements at 600 nm were performed every hour by sampling 100 µL of every  
150 culture. For each strain, data obtained from 3 independent cultures grown on the  
151 same day were averaged and represented by the mean ± SD.

152

### 153 **Infection in the *Galleria mellonella* caterpillar**

154 For *G. mellonella* caterpillar infection, bacteria were grown in LB medium overnight at  
155 37°C (50 µg/mL of kanamycin was added to mutant strains). Cultures were diluted  
156 1:50 in LB medium and incubated for another 4 h at 37°C. Bacteria were pelleted for  
157 5 min at 7500 rpm at room temperature (RT) and the supernatant was discarded.  
158 Bacteria were resuspended in 500 µL sterile PBS, adjusted to an OD<sub>600</sub> nm of 1.0  
159 and diluted 1:10 in sterile PBS. 5 µL of this dilution, corresponding to 3 x 10<sup>5</sup> colony-  
160 forming units (CFUs), was injected into the last right proleg of *G. mellonella*  
161 caterpillars (purchased from TZ-TERRARISTIK, Germany, and BioSystems  
162 Technology TruLarv, UK). As a control, caterpillars were injected with 5 µL of sterile

163 PBS. Three independent experiments were performed with groups of 16 caterpillars  
164 for every bacterial strain and control. The caterpillars were incubated at 37°C for 5  
165 days and checked daily for vitality. Experiments with more than 2 dead caterpillars  
166 within 5 days in the control group were not considered valid. CFUs were determined  
167 by serial dilutions, plated on nutrient agar, and colonies were counted after  
168 incubation at 37°C for 18 h. For each strain, data obtained from 3 independent  
169 experiments were averaged and represented by the mean  $\pm$  SD.

170

### 171 **Determination of susceptibility to antibiotics**

172 For the minimal inhibitory concentration (MIC) tests, bacteria were grown in LB  
173 medium overnight at 37°C (to mutant strains 50  $\mu$ g/mL of kanamycin was added).  
174 Cultures were diluted 1:50 in LB medium and incubated (without antibiotics) another  
175 4 h at 37°C. Agar plates were flushed with 2 mL of each culture and E-test strips  
176 (Liofilchem, Italy) were deposited on nutrient agar plates. MICs were determined after  
177 incubation for 16 h at 37°C. Three independent experiments were performed and  
178 statistical significance was tested by the Student's *t* test (2-tailed, unpaired).

179

### 180 **Pellicle biofilm assays**

181 *A. baumannii* strains were grown in LB medium overnight at 37°C (50  $\mu$ g/mL of  
182 kanamycin was added to mutant strains). The cultures were adjusted to an OD<sub>600</sub> nm  
183 of 1.0 and 3 mL of LB medium (without antibiotics) was inoculated with 15  $\mu$ L of OD-  
184 adjusted culture. Samples were incubated at RT for at least 3 days. The LB medium  
185 was removed using a thin cannula and the biofilm (sticking to the tube wall) was  
186 stained with a 0.5% crystal violet solution (w/v in Aqua Bidest) for 20 min. The crystal



187 violet was removed and the biofilm was washed twice with 4 mL Aqua Bidest. The  
188 biofilm was scrubbed and flushed off the tube walls with a pipet tip and 96% alcohol  
189 solution. The absorption at 550 nm was determined. Samples which showed an OD >  
190 1.0 were diluted 1:10 with 96% ethanol for measurement. For each strain 3  
191 independent experiments were performed and statistical significance was analyzed  
192 by the Student's *t* test (2-tailed, unpaired).

193

## 194 **Microscopy**

195 The bacterial strains ATCC 17978, ATCC 17978 *ompA::Km*, 29D2, and 29D2  
196 *ompA::Km* were grown for 16 h at 37°C under constant shaking. One  $\mu$ L of each  
197 bacterial overnight culture was pipetted on a glass slide and analyzed under the  
198 bright field microscope (200 times magnification).

199

## 200 **Statistical analysis**

201 All experiments were performed at least 3 times. Comparison between groups was  
202 performed using GraphPad Prism 7 with Student's *t* test (2-tailed, unpaired). P-values  
203 less than 0.05 were considered to be statistically significant.

204

## 205 **Results**

### 206 **Surface-associated motility**

207 Approximately 2,000 transposon mutants of ATCC 17978 were screened for surface-  
208 associated motility phenotypes and 30 were identified with motility defects. Previous  
209 studies were limited to the characterization of mutations in single strains. Here, to

210 provide a comparative study, we introduced at least one mutation of every gene  
211 function category into 29D2 to get insight into strain-specific and species-specific  
212 traits.

213 To this end, surface-associated motility was analyzed on 0.5% agarose plates. The  
214 diameter ( $\emptyset$ ) of the surface motility spreading zone of 3 independent experiments  
215 was measured and analyzed (Fig. 1A and Suppl. Table S3). All selected motility-  
216 deficient mutants of ATCC 17978 exhibited at least a 7-fold reduction of the  
217 spreading zone. Subsequently, DNA isolated from these transposon mutants was  
218 used to generate mutants in 29D2. All 29D2 mutants displayed a motility-deficient  
219 phenotype compared to the wildtype strain (Fig. 1B). Note that the surface-  
220 associated motility spreading zone of the wildtype ATCC 17978 (mean  $\emptyset$  of 78 mm)  
221 was more than twice as large as that of the 29D2 wildtype strain (mean  $\emptyset$  of 30 mm).  
222 Most ATCC 17978 mutants showed a 16-fold reduced surface-associated motility  
223 compared to the wildtype strain (Fig 2A), whereas the *a1s\_0806* (encoding an  
224 aminotransferase) mutant lacked almost any measurable surface-associated motility  
225 (mean  $\emptyset$  of 1 mm). 3 mutants, *purH::Km* (mean  $\emptyset$  10.25 mm), *1970::Km* (mean  $\emptyset$   
226 8.75 mm), and *3297::Km* (mean  $\emptyset$  11 mm), showed 10-fold reduced surface-  
227 associated motility. Most 29D2 mutants displayed a 4-fold reduction in their surface-  
228 associated motility. The most pronounced reduction in motility appeared in mutants  
229 *purH::Km* (mean  $\emptyset$  5 mm), *purF::Km* (mean  $\emptyset$  3.75 mm), and *ddc::Km* (mean  $\emptyset$  4.25  
230 mm). The mutant *purM::Km* (mean  $\emptyset$  of about 16 mm) had the lowest reduction in  
231 surface-associated motility.

232 To summarize, all mutations initially identified in ATCC 17978 that conferred motility  
233 defects were also found to cause motility-deficient phenotypes when introduced into  
234 the orthologous genes of 29D2.

235

## 236 **Pellicle biofilm formation**

237 The formation of pellicles, a specific form of biofilm, occurs at the air-liquid interface  
238 and is distinct from submerged biofilms [39,44,45]. A correlation between surface-  
239 associated motility and pellicle biofilm formation has been described for *A. baumannii*  
240 [39]. We examined the ability of our motility-deficient mutants to form pellicles.  
241 Pellicle biofilms were incubated 3 days, stained with a 0.5% crystal violet solution,  
242 and analyzed by OD measurements (Suppl. Table S4). Pellicle-biofilm formation in  
243 wildtype ATCC 17978 was measured to be about 8.6 at OD<sub>550</sub> nm (Fig. 2A). A broad  
244 spread between low and high pellicle-producing mutants was visible, ranging  
245 between a 1.8-fold increase to more than a 25-fold decrease. For 15 of 30 mutants  
246 less than 67% of the wildtype-specific pellicle biomass was quantified (Table 1 and  
247 Fig. 2A). In the mutants *carB::Km*, *0414::Km*, and *prpF::Km* a pellicle biomass less  
248 than 8% compared to the wildtype biomass was measured. This dramatic decrease  
249 was not observed by inactivation of the orthologous gene in the 29D2 background. In  
250 ATCC 17978, 8 mutants (*purH::Km*, *purM::Km*, *purE::Km*, *0530::Km*, *3297::Km*,  
251 *galE::Km*, *0806::Km*, and *1055::Km*) were able to produce more pellicle biomass  
252 compared to the wildtype strain, of which the mutants *0530::Km*, *galE::Km*, and  
253 *0806::Km* produced 50-80% more pellicle biomass compared to wildtype (Fig. 2A).  
254 29D2 mutants only displayed small changes in pellicle biofilm formation compared to  
255 wildtype, with a range of the mutants' pellicle biomass production from a 1.3-fold  
256 increase to a 2.1-fold decrease. 13 of 21 tested 29D2 mutants did not display any  
257 significant change in their pellicle biofilm formation compared to the parental strain  
258 (Table 2). Deficiencies could be observed in the following 6 mutant strains: *carB::Km*,  
259 *1970::Km*, *ddc::Km*, *dat::Km*, *gidA::Km*, and *3026::Km*, which produced less than

260 70% of the 29D2 wildtype-specific pellicle biomass. Only the following 2 mutants  
261 produced significantly more pellicle biomass (Fig. 2B) compared to the wildtype  
262 strain: *purH::Km* (30%) and *galE::Km* (38%).

263 In summary, the ATCC 17978 parental strain produced more pellicle biofilms  
264 compared to 29D2. Conspicuous changes in biofilm formation could mainly be  
265 observed among ATCC 17978 mutants. Concordance of pellicle formation  
266 phenotypes between the mutants of both strains was limited suggesting that strain-  
267 specific traits that are independent of surface-associated motility influence pellicle  
268 biomass production.

269

## 270 **Bacterial growth**

271 The ability of motility-deficient mutants to grow as a planktonic culture under aeration  
272 was assayed. Growth curves and data for all tested strains are provided in  
273 supplementary Fig. S4 (ATCC 17978 mutants), supplementary Fig. S5 (29D2  
274 mutants), and Table S5. For 17978, 22 of 30 tested mutant strains exhibited  
275 significant growth defects compared to the parental strain (Table 1). The most striking  
276 growth defects (Fig. 3A) were observed in the mutants defective in purine  
277 biosynthesis (*purH::Km*, *purF::Km*, *purM::Km*, and *purE::Km*), pyrimidine biosynthesis  
278 (*carB::Km*), and diaminopropane biosynthesis (*ddc::Km* and *dat::Km*). Only 8 of 30  
279 tested mutant strains were able to grow without any defect compared to the parental  
280 strain (Table 1). By testing the 29D2 mutant strains we observed 13 of 21 strains with  
281 notable planktonic growth defects (Table 2). Within this group most striking defects  
282 were observed with mutations associated with purine biosynthesis (*purH::Km*,  
283 *purF::Km*, *purM::Km*, and *purE::Km*), pyrimidine biosynthesis (*carB::Km*), folate

284 biosynthesis (*1566::Km*), and diaminopropane biosynthesis (*ddc::Km* and *dat::Km*).  
285 Additionally, *galE::Km*, *comEC::Km*, and *prpF::Km* mutants displayed strong growth  
286 deficiencies (Fig. 3B). The mutant *ompA::Km* showed growth comparable to the  
287 parental strain for up to 4 h, reached a growth maximum of  $2.5 \pm 0.28$  OD<sub>600</sub> nm after  
288 5 h, but then slowly collapsed to  $1.36 \pm 0.73$  after 9 h. No growth defects were  
289 observed in 8 of 21 tested mutants (Table 2).

290 In summary, we found that genes involved in purine/pyrimidine and diaminopropane  
291 biosynthesis, oxidative stress, and propionate catabolism were crucial for growth of  
292 ATCC 17978 and 29D2 in LB medium.

293

#### 294 ***G. mellonella* caterpillar infection**

295 To gain insight into a possible correlation between motility and virulence we made  
296 use of the *G. mellonella* infection model. Caterpillars were infected with  $3 \times 10^5$  CFU  
297 of different *A. baumannii* strains and the death of larvae was monitored over a time  
298 period of 5 days. *G. mellonella* infection of ATCC 17978 wildtype and mutant strains  
299 is shown in supplementary Fig. S6 and levels of significance for 5 days post-infection  
300 are presented in Table 1. A detailed listing of p-values for every monitored timepoint  
301 is provided in supplementary Table S6. After 24 h post-infection with the 17978  
302 wildtype strain about 60% of larvae were dead. This number increased to over 80%  
303 of dead larvae after 5 days post-infection. 15 of 30 tested mutant strains displayed a  
304 significant attenuation in *G. mellonella* infection (Table 1). Another 4 mutant strains  
305 (*purE::Km*, *1624::Km*, *rpmG::Km*, and *ddc::Km*) showed some attenuation but this  
306 was not significant. The remaining 11 mutant strains did not display attenuation  
307 (Suppl. Fig. S6 and Table 1). Most pronounced attenuation was observed in strains

308 *carB::Km*, *metG::Km*, *ompA::Km*, and *galE::Km* (Fig. 4A). These results suggest an  
309 important role for these genes in *A. baumannii* virulence. However, to exclude the  
310 possibility that attenuation could be due to decreased planktonic growth, we  
311 compared the caterpillar infection results to our bacterial growth data (Fig. 3, Suppl.  
312 Fig. S4, and Fig. S5). Among the above mentioned mutants, only the *galE::Km*  
313 mutant was not significantly affected in growth. Overall, we found that for 11 of 15  
314 significantly attenuated mutant strains the caterpillar infection data could possibly be  
315 influenced by decreased growth rates (Table 1 and Fig. 3).

316 The *G. mellonella* infection with 29D2 wildtype and mutant strains data is shown in  
317 supplementary Fig. S7 and significance levels (for 5 days post-infection) are shown in  
318 Table 2. A detailed listing of p-values for every monitored timepoint is provided in  
319 supplementary Table S7. 11 of 21 29D2 mutants were significantly attenuated in the  
320 *G. mellonella* infection model (Suppl. Fig S7 and Table 2). Within this group the most  
321 pronounced attenuation was observed in strains *carB::Km*, *ompA::Km*, *galE::Km*, and  
322 *comEC::Km* (Fig. 4B). The mutant strains *purE::Km*, *gidA::Km*, and *0806::Km*  
323 showed some attenuation at 5 days post-infection but p-values ranged between  
324 0.060 – 0.067 (Suppl. Table S7). Interestingly, 8 of 11 significantly attenuated mutant  
325 strains (*purH::Km*, *1566::Km*, *carB::Km*, *ompA::Km*, *ddc::Km*, *comEC::Km*, *galE::Km*,  
326 and *2761::Km*) manifested a growth deficiency compared to the parental strain  
327 (Suppl. Fig. S5 and Table 2).

328 In summary, concordant infection traits were observed for 12 mutants of both strains  
329 including mutants affected in purine/pyrimidine/folate biosynthesis. Among these 12  
330 strains, most significant attenuation was observed for *carB::Km*, *ompA::Km*, and  
331 *galE::Km*.

332 As a control, the CFUs were determined from the OD-adjusted bacterial cultures  
333 used for the infection experiments. To this end, OD-adjusted cultures were serially  
334 diluted and plated on nutrient agar. Colonies were counted after incubation for 18 h  
335 at 37°C. Interestingly, for both ATCC 17978 *ompA::Km* and 29D2 *ompA::Km* mutants  
336 we observed 1-2 log scale lower CFU numbers compared to the OD-adjusted  
337 suspension (data not shown). Sticking of cells to the tube wall during the dilution  
338 process was minimized by using low-binding tubes (Eppendorf). When growing both  
339 *ompA::Km* mutants on agar plates we observed a very sticky colony texture upon  
340 touching with a glass rod. Based on these findings we examined the cell morphology  
341 of *ompA::Km* mutant strains under the microscope. A distinct cell elongation or chain  
342 formation of both *ompA::Km* mutant strains compared to their parental strains was  
343 observed (Supplementary Fig. S8).

344

### 345 **MIC Determination**

346 We aimed to elucidate the correlation between motility-deficient mutants and their  
347 sensitivity to the bactericidal antibiotics ampicillin and imipenem as well as to the  
348 bacteriostatic antibiotic tetracycline. For ATCC 17978, 18 of 30 mutants displayed a  
349 significant resistance to ampicillin compared to the parental strain. The highest MIC  
350 values were obtained in mutant strains *0414::Km* (4-fold increase compared to the  
351 parental strain), *3026::Km* (4-fold increase), and *1566::Km* (3.7-fold increase). The  
352 only mutant strain which showed decreased resistance (0.7-fold decrease) to  
353 ampicillin was *aamA::Km* (Table 3). By contrast, a significantly increased sensitivity  
354 to imipenem was observed in six (*purE::Km*, *carB::Km*, *1624::Km*, *rpmG::Km*,  
355 *1970::Km*, and *aamA::Km*) of the tested strains (Table 1). Furthermore, a significantly

356 increased resistance to imipenem was observed in 4 of the tested mutant strains  
357 (*ompA::Km*, *3297::Km*, *0806::Km*, and *3026::Km*). For tetracycline, we found 13 of 30  
358 mutants to be significantly more sensitive compared to the parental strain. Only 2 of  
359 30 mutant strains, *purF::Km* and *galE::Km*, displayed significantly increased  
360 resistance to tetracycline (Table 1). Next, we analyzed all 29D2 mutant strains with  
361 respect to the MIC values for ampicillin, imipenem, and tetracycline. A significantly  
362 increased sensitivity to ampicillin was observed in 15 of 21 tested mutant strains  
363 compared to wildtype (Table 2). The only strain with significantly increased resistance  
364 to ampicillin was *3026::Km*, with a 1.7-fold increased MIC value (Table 3). Another  
365 mutant strain with a 1.5-fold increased ampicillin MIC value, although not significant,  
366 was *aamA::Km*. Similar effects were observed for imipenem (Table 3). Here, strains  
367 *3026::Km* and *aamA::Km* displayed significant resistance compared to the parental  
368 strain (Table 2). Increased sensitivity to imipenem was observed in 8 of 21 tested  
369 mutants. For the MIC values of tetracycline, we found the 3 mutant strains *1566::Km*  
370 (3.6-fold decrease), *comEC::Km* (5.4-fold decrease), and *prpF::Km* (6.5-fold  
371 decrease) to be significantly more susceptible compared to the parental strain (Table  
372 3). Only one mutant, *dat::Km*, was significantly more resistant to tetracycline with a  
373 1.8-fold increase (Table 3).

374 In conclusion, mutants from the 29D2 background predominantly showed increased  
375 sensitivity to all tested antibiotics. By contrast, many mutants of ATCC 17978 showed  
376 increased resistance to ampicillin, but increased sensitivity to imipenem and  
377 tetracycline.

378

379



## 380 Discussion

381 Recently, *A. baumannii* was demonstrated to exhibit motility on semi-dry plates, with  
382 agar concentrations between 0.2-0.4%, and motility was dependent on the type of  
383 agar that was used. Bacterial surface spreading was shown not to depend on type IV  
384 pili [26]. Here, we characterized 30 genes involved in *A. baumannii* surface-  
385 associated motility with respect to bacterial growth, pellicle biofilm formation,  
386 virulence, and antibiotic resistance. We discuss motility-deficient mutants with  
387 regards to their known/putative gene function in the bacterial cell (Fig. 5).

388

### 389 Genes involved in purine/pyrimidine/folate biosynthesis

390 In our study we identified 4 proteins involved in purine (*pur*) biosynthesis to be  
391 essential for *A. baumannii* surface-associated motility: PurH, PurF, PurM, and PurE  
392 (Tables 1 and 2). The decrease in surface motility of these mutants ranged from a  
393 25-fold decrease in ATCC 17978 to a 2.1-fold decrease in 29D2 compared to their  
394 parental strains (Suppl. Table S3). In *A. nosocomialis* strain M2, EZ::Tn insertion in  
395 gene *purK* (*a1s\_2963*) has been previously described to result in a 70% reduction in  
396 surface motility compared to the parental strain [26]. Mutations in the genes *purD*,  
397 *purF*, *purH*, *purL*, and *purM* abolished K<sup>+</sup>-dependent colony spreading in *Bacillus*  
398 *subtilis* [46]. The *pur* genes were also demonstrated to be essential for biofilm  
399 formation in *Bacillus cereus* (*purH* and *purD* [47]; *purA* [48]; *purA*, *purC*, and *purL*  
400 [49]). Interestingly, our study revealed no defective role of *pur* genes in pellicle biofilm  
401 formation. In contrast, mutations *purH::Km*, *purM::Km*, and *purE::Km* in 17978 and  
402 *purH::Km* in 29D2 produced significantly more pellicle biomass than their parental  
403 strains (Tables 1 and 2). A pellicle proteome study in 17978 showed that the *pur*

404 proteins were differentially expressed/accumulated under planktonic (PurH, PurF,  
405 and PurA), 1-day pellicle (PurM and PurB), and 4-day pellicle (PurD) growth  
406 conditions [44].

407 In addition to the motility deficiency, we found all tested *pur* mutants to display  
408 bacterial growth defects in LB media (Suppl. Figs. S4 and S5). For various bacteria,  
409 *pur* genes were identified to be required for bacterial growth in human serum  
410 including *Enterococcus faecium* (*purL*, *purH*, and *purD*) [50], *E. coli* (*purA*, *C*, *D*, *E*, *F*,  
411 *H*, *K*, *L*, and *M*), *S. enterica* (*purA*, *B*, *C*, *D*, *E*, *F*, *G*, and *H*), and *B. anthracis* (*purE*  
412 and *purK*) [51]. Due to the fact that all *pur* mutants displayed bacterial growth defects  
413 we expected these mutants to be attenuated in the *G. mellonella* infection, but we  
414 only found the 2 mutants ATCC 17978 *purM::Km* and 29D2 *purH::Km* had significant  
415 attenuation (Fig. 4). Purine biosynthesis mutants (*purF*, *purD*, and *purL*) in  
416 *Burkholderia cenocepacia* were also found to be attenuated in the *G. mellonella*  
417 infection model as well as in *C. elegans* and *D. melanogaster* infections [52]. *De novo*  
418 purine biosynthesis has also been shown to be required for virulence in ATCC 17978  
419 (*purF*, *purD*, *purN*, *purL*, *purM*, *purK*, *purE*, *purC*, *purP*, and *purO*) in the mouse lung  
420 [53], and in several other bacteria such as *Streptococcus pneumoniae* (*purE*, *purK*,  
421 *purC*, and *purL*) [54], *Bacillus anthracis* (*purH*) [55], and *Pasteurella multocida* (*purF*)  
422 [56].

423 The *pur* mutants were tested for antibiotic sensitivity/resistance against ampicillin,  
424 imipenem, and tetracycline. For ampicillin MIC's we obtained very contrary results.  
425 The *pur* mutants of 29D2 showed increased sensitivity to ampicillin, but, except for  
426 *purH::Km*, the *pur* mutants of ATCC 17978 were significantly more resistant  
427 compared to their parental strain (Table 3). In *S. aureus* defective rifampicin  
428 persistence was shown for *purB*, *purF*, *purH*, and *purM* [57].

429 The *A. baumannii* gene *a1s\_2687* encodes the large subunit (*carB*) of  
430 carbamoylphosphate synthase and is arranged with the small subunit (*carA*) in the  
431 *carAB* operon, which is required for the *de novo* synthesis of arginine and pyrimidines  
432 (reviewed in [58]), and in turn pyrimidines are known to be involved in biofilm  
433 formation in *P. aeruginosa* [59] and *E. coli* [60]. In *A. baumannii*, inactivation of *carB*  
434 caused a significantly decreased persistence in a mouse pneumonia model [53]. The  
435 contribution of *carB* to *A. baumannii* virulence was confirmed by our results, showing  
436 significant attenuation in both ATCC 17978 *carB::Km* and 29D2 *carB::Km* mutant  
437 strains (Fig. 4). Additionally, in a *P. aeruginosa* competition study against *B. cepacia*,  
438 *K. pneumoniae*, and *S. aureus*, the *carB* gene and hence uracil/pyrimidine  
439 biosynthesis was identified to be essential [61]. Inactivation of *carB* in ATCC 17978  
440 and 29D2 resulted in the greatest phenotypic alterations in planktonic growth, pellicle  
441 biofilm formation, and *G. mellonella* caterpillar infection of all tested mutants (Tables  
442 1 and 2). Interestingly, similar observations were also made for the  
443 gammaproteobacterium *Xanthomonas citri* subsp. *citri*. In that study, the knockout of  
444 *carB* resulted in a 70% decrease in biofilm formation, an extensive reduction in  
445 swimming motility, and alterations in bacterial growth [62]. CarB was also found to be  
446 required for growth of *E. coli* in human serum [51]. A motility-deficient phenotype was  
447 identified for the gene *a1s\_1566* (putative 6-pyruvoyl-tetrahydropterin synthase),  
448 involved in folate biosynthesis and thus crucial for biosynthesis of purines and  
449 deoxythymidine monophosphate (Fig. 1). Here we observed an involvement in  
450 virulence, bacterial growth, and pellicle biofilm formation (Tables 1 and 2). Taken  
451 together, these findings suggest that purine and pyrimidine genes contribute to  
452 important bacterial processes like motility, bacterial growth, pellicle biofilm formation,

453 and virulence not only in *Acinetobacter* but also in well studied genera like *Bacillus*  
454 and *Salmonella*.

455

#### 456 **Genes involved in alarmone/damage metabolism**

457 The *A. baumannii* genes *a1s\_0414* and *a1s\_1624* encode for an Ap5A  
458 pyrophosphatase and an Ap4A hydrolase (ApaH-like), respectively, and are  
459 proposed to be involved in depletion of putative alarmones/signaling molecules  
460 [63,64] and/or damage metabolites [65,66]. Recent work suggests that dinucleoside  
461 polyphosphates can be used by RNA polymerases to initiate transcription and to act  
462 as 5'-RNA caps that may stabilize RNA, while ApaA-like hydrolases are able to  
463 remove these caps [67]. The Ap4A hydrolase knockout mutant *a1s\_1624::Km* seems  
464 to play a role in *A. baumannii* surface motility and planktonic growth (Table 1). An  
465 *E. coli* Ap4A hydrolase (*apaH*) knockout mutant was previously associated with  
466 decreased motility [68]. In *Salmonella enterica* adhesion and invasion capacity into  
467 epithelial cells was reduced for the  $\Delta$ *apaH* mutant [69]. Additionally, the  
468 *a1s\_1624::Km* mutant exhibited increased sensitivity to imipenem (Table 1).  
469 Increased sensitivity of  $\Delta$ *apaH* mutants against kanamycin and streptomycin was  
470 also shown for ATCC 17978, *E. coli*, and *P. aeruginosa* [70], and decreased  
471 sensitivity of  $\Delta$ *apaH* mutants, in the form of persister cells, was found in *E. coli* [71].  
472 Although we could not observe a significant impact of *a1s\_1624::Km* on pellicle  
473 formation, others have shown A1S\_1624 to be overproduced in pellicle cells in ATCC  
474 17978 [44], and Ap4A metabolism impacts biofilm formation in *Pseudomonas*  
475 *fluorescens* [72]. The Ap5A pyrophosphatase knockout in ATCC 17978 resulted in a  
476 significant reduction in pellicle biofilm formation, significant attenuation of *G.*

477 *mellonella* infection, and resistance against ampicillin (Table 1). Interestingly, in the  
478 corresponding *a1s\_0414::Km* mutant of 29D2, only surface-associated motility was  
479 affected (Table 2).

480 In general, Ap4A and Ap5A are thought to be synthesized by aminoacyl-tRNA  
481 synthetases in the absence of tRNAs during amino acid activation. This process  
482 requires ATP and a cognate amino acid [73,74]. Providing a possible link, we found a  
483 methionyl-tRNA synthetase in our surface motility-deficient library (discussed below).

484

### 485 **Genes involved in RNA modification/regulation**

486 We found 3 genes involved in the regulation and/or modification of RNAs: *metG*  
487 (methionyl-tRNA synthetase, *a1s\_0778*), *rpmG* (50S ribosomal protein L33,  
488 *a1s\_0447*), and *gidA* (glucose-inhibited division protein A, a tRNA modification  
489 enzyme, *a1s\_2182*). The deficiency in motility of *gidA* mutants has been described  
490 mainly for swarming motility in bacteria like *Bacillus cereus* [48], *Serratia* species  
491 SCBI [75], and *Pseudomonas syringae* [76]. In the present study, a *gidA* null allele in  
492 strains ATCC 17978 and 29D2 resulted in small decreases in their planktonic growth  
493 (Suppl. Fig. S4 and S5). Contrary results for  $\Delta$ *gidA* bacterial growth has been  
494 reported (reviewed in [77]). Interestingly, proteomic analysis of *A. baumannii*  
495 planktonic and biofilm growth identified *GidA* only under biofilm growth conditions  
496 [78], while several studies reported the negative effect of *gidA* mutants on biofilm  
497 formation in different bacteria [79,80]. In the present study we also saw a significant  
498 reduction of the pellicle-biofilm formation in both *gidA::Km* mutants (Fig. 2). An  
499 essential role of *gidA* in pellicle-biofilm formation was also shown in *Bacillus cereus*  
500 [48]. While several *GidA*-associated virulence effects have been reported (reviewed

501 in [77]) we did not see significant attenuation in the *G. mellonella* infection model  
502 (Suppl. Figs. S6 and S7).

503 In contrast, the knockout of *metG* (*a1s\_0778*) was associated with a significant  
504 attenuation in the *G. mellonella* infection model (Fig. 4). Similarly, involvement of  
505 *metG* in *A. baumannii* virulence was also shown in a mouse pneumonia model [53].  
506 The *metG::Km* mutant revealed a significantly reduced ability to form pellicles (Fig.  
507 2). Moreover, MetG was found to be more abundant in *A. baumannii* pellicle cells  
508 than in planktonic cells [44]. In our study we found the *metG::Km* mutant to be more  
509 sensitive to tetracycline (Table 1), which agrees with observations of amino acid  
510 substitutions of MetG associated with increased antibiotic tolerance in *Burkholderia*  
511 *thailandensis* [81] and *E. coli* [82,83].

512 We observed increased sensitivity of the *rpmG::Km mutant* to imipenem and  
513 tetracycline (Table 1). This data is in line with a study which showed that a mitomycin  
514 C resistance phenotype was associated with RpmG overproduction in *E. coli* [84]

515

## 516 **Genes involved in oxidative stress**

517 The ATCC 17978 gene *a1S\_3366* is predicted to encode a gamma-glutamyl-  
518 cysteine ligase (*gshA*) which is required to synthesize glutathione (GSH), an  
519 antioxidant molecule that protects cells against oxidative stress [85,86]. Different  
520 studies observed a decrease in swarming [87], swimming [87,88], and twitching  
521 motility [88] of the *P. aeruginosa*  $\Delta gshA$  mutant compared to the parental strain.  
522 Contrary results were found for the ability of *P. aeruginosa*  $\Delta gshA$  to form biofilms  
523 (increased in [88] and decreased in [87]). We did not find any changes in pellicle  
524 biofilm production compared to the parental strains for both of our *gshA* mutants (Fig.

525 2). In *Acinetobacter baylyi* the knockout of *gshA* increased sensitivity to  
526 metronidazole and ciprofloxacin [89]. We observed an enhanced sensitivity to  
527 ampicillin for the 29D2 *gshA::Km* mutant, but the ATCC 17978 *gshA::Km* mutant  
528 showed a resistant phenotype (Table 3). Attenuation in *G. mellonella* infection was  
529 observed for the ATCC 17978 *gshA* mutant strain, which agrees with other studies  
530 describing *gshA* mutants to be attenuated in *C. elegans* infection (*P. aeruginosa* [90])  
531 and a murine infection model (*Salmonella* [91]).

532 The *A. baumannii* gene *a1s\_0530* encodes for a rhodanese domain-containing  
533 protein, a putative sulfurtransferase, supposed to be involved in oxidative stress  
534 detoxification and sulfur metabolism [92-95]. The only knockout-related phenotype,  
535 besides surface-associated motility-deficiency, that we observed in ATCC 17978 was  
536 a significant increase in pellicle biofilm production (Fig. 2A). Finally, the involvement  
537 of oxidative stress response proteins in air-liquid pellicles has been described  
538 recently in a proteomic study of ATCC 17978 [44].

539

#### 540 **Outer membrane proteins**

541 The gene *a1s\_3297* encodes a putative outer membrane protein and *a1s\_1970*  
542 encodes a putative membrane-associated Zn-dependent protease (RseP). Here we  
543 show that both genes are involved in *A. baumannii* virulence, pellicle formation, and  
544 antimicrobial resistance (Tables 1 and 2).

545 We found OmpA to be involved in *A. baumannii* surface-associated motility, which  
546 has been described for the *A. nosocomialis* strain M2 by Clemmer *et al.* [26]. Several  
547 studies have reported the involvement of OmpA in biofilm formation [96-98] and  
548 OmpA, along with other outer membrane proteins, was observed to accumulate in *A.*

549 *baumannii* pellicle cells compared to planktonic cells [44]. We found the *ompA*  
550 knockout associated with a significant decrease in pellicle biofilm formation in ATCC  
551 17978 but not in 29D2 (Fig. 2). For *A. baumannii* and a number of other pathogens,  
552 OmpA has been identified as a virulence factor and its importance in bacterial  
553 pathogenicity has been shown recently (reviewed in [99]). For example, the loss of  
554 OmpA impaired virulence of *A. baumannii* in *C. elegans* [100] and *Klebsiella*  
555 *pneumoniae* virulence in *G. mellonella* [101]. In our study, the knockout of *ompA* in  
556 both tested strains significantly decreased the mutant's ability to kill *G. mellonella*  
557 caterpillars (Fig. 4). We observed 1-2 log scale lower CFU numbers (for both mutant  
558 strains) compared to the OD-adjusted suspension which was used to infect the  
559 caterpillars. This observation led us to examine the mutant's cell morphology by  
560 microscopy. We found the *ompA::Km* mutants exhibiting filamentous cell phenotypes  
561 in contrast to the parental strains (Suppl. Fig. S8). Filamentous cell morphologies are  
562 known to provide bacterial survival advantages, e.g. protection against phagocytosis,  
563 resistance against antibiotics, and enhanced response to environmental cues like  
564 quorum sensing [102]. In other bacteria, the loss of outer membrane proteins, like the  
565 Tol-Pal system or OmpA-like proteins, resulted in reduced membrane integrity and  
566 alterations in cell division [103,104]. OmpA is involved in the ability of *A. baumannii*  
567 to grow and persist in human serum [11,105] and in the adherence and invasion of  
568 epithelial cells [106]. A resistance phenotype was only observed for the ATCC 17978  
569 *ompA::Km* mutant strain. This mutant showed a 2-fold increase in MIC for imipenem  
570 compared to the parental strain (Table 3), correlating with the published finding that  
571 the *A. baumannii* OmpA C-terminus is important for resistance to antibiotics including  
572 imipenem [107].

573



574 **Genes involved in 1,3-diaminopropane biosynthesis**

575 As previously shown, mutations in the genes *dat* and *ddc* resulted in a dramatic  
576 reduction in surface-associated motility, but can be restored by supplementation with  
577 120  $\mu$ M DAP [33]. In the present study, we observed motility deficiency for these  
578 genes in 29D2 (Table 2). We also gained new insight into the pleiotropic effects of  
579 the *dat::Km* and *ddc::Km* mutants, such as a significant decrease in pellicle biofilm  
580 formation. This observation might represent species-specific traits as we see this  
581 effect in both tested strains (ATCC 17978 and 29D2), whereas we see contradictory  
582 results for the MIC assays (Table 3).

583

584 **Genes involved in lipopeptide synthesis/export**

585 The genes *a1s\_0113* and *a1s\_0116* are involved in the synthesis and export of a  
586 lipopeptide and are part of an operon consisting of 8 genes [26,108]. The knockout of  
587 *a1s\_0113* (acyl-CoA dehydrogenase) in *A. nosocomialis* clinical isolate M2 resulted  
588 in a significant surface motility defect [26], which correlates with our observation in  
589 ATCC 17978 (Fig. 1A). We found both mutants to show similar pleiotropic effects in  
590 ATCC 17978 (Table 1). Additionally, other genes of this operon have been reported  
591 to be necessary for motility (*a1s\_0112* and *a1s\_0115* [39]), pellicle biofilm formation  
592 (*a1s\_0112* and *a1s\_0115* [39]; *a1s\_0114* [108]), and biofilm formation on abiotic  
593 surfaces (*a1s\_0114* [108,109]). A pellicle proteome analysis in ATCC 17978 found  
594 the proteins A1S\_0112-A1S\_0118, with the exception of A1S\_0114, to accumulate in  
595 the pellicle [44]. Since the gene *a1s\_0116* encodes an RND superfamily transporter,  
596 it may thus play a role in multi-drug resistance. Deletion of *a1s\_0116* in ATCC 17978  
597 resulted in significantly increased ampicillin resistance compared to the parental

598 strain whereas no differences were observed for testing with imipenem and  
599 tetracycline (Table 3). A transcriptomic study on imipenem-resistant ATCC 17978  
600 cells showed decreased expression of genes from the *a1s\_0112-a1s\_0119* cluster  
601 [110]. Clemmer *et al.* speculated that the lipopeptide synthesized from the *a1s\_0112-*  
602 *a1s\_0119* operon may act as a surfactant to promote motility, but they could not  
603 detect any surfactant activity in *A. nosocomialis* culture supernatants [26]. While we  
604 could not show a significant effect of *a1s\_0113* or *a1s\_0116* inactivation on virulence  
605 in *G. mellonella*, significant attenuation was observed in the same model for an  
606 *a1s\_0114* mutant [108]. No essential role of any of the *a1s\_0112-a1s\_0119* genes in  
607 virulence was also found for strain AB5075 [111]. In conclusion, our data confirm  
608 findings by other groups [26,39,109,108,44] indicating that genes of the *a1s\_0112-*  
609 *a1s\_0119* operon are essential for surface motility and pellicle biofilm formation in  
610 *A. baumannii*.

611

## 612 **Genes involved in DNA modification/repair/uptake**

613 We found 4 genes in our library to be involved in DNA modification, uptake, and  
614 recombination. The gene *a1s\_0222*, designated as *aamA*, encodes a Type II N6-  
615 adenine DNA methyltransferase [112,113]. Methylation is important for the regulation  
616 of various physiological processes [114,115]. We speculate the phenotype of both  
617 *aamA* mutants to represent strain-specific traits (Tables 1 and 2). In bacteria DNA  
618 methylation is the most studied epigenetic mechanism and the *E. coli* Dam protein is  
619 the most prominent orphan DNA adenine methyltransferase [116]. For other bacteria  
620 like *S. enterica*, *Y. enterocolitica*, and *K. pneumoniae* different phenotypes of *dam*

621 mutants and *dam* overexpression were shown to affect motility, virulence, and other  
622 traits (reviewed in [117]).

623 The *A. baumannii* gene *a1s\_2334* encodes an S-adenosyl-L-homocysteine hydrolase  
624 (*sahH*), which takes part in the recycling of S-adenosyl-L-methionine (SAM). Here we  
625 show that inactivation of *sahH* in *A. baumannii* leads to pleiotropic effects such as  
626 strong motility deficiency, a significant attenuation in *G. mellonella* caterpillar  
627 infection, and increased antibiotic resistance (Table 1). Furthermore, we found the  
628 Holliday junction helicase subunit A (*ruvA/ a1s\_2587*) to be important for *A.*  
629 *baumannii* surface-associated motility, pellicle biofilm formation, and antibiotic  
630 resistance in ATCC 17978 (Table 1).

631 We identified the gene *a1s\_2610* in our mutant library screening. Designated as  
632 *comEC*, this gene is involved in DNA uptake and incorporation of exogenous DNA  
633 into the genome. Phenotypically, a linkage between motility and natural  
634 transformation competence was shown in that *A. baumannii* can take up DNA while  
635 moving along wet surfaces [16] and its transformability is influenced by motility-  
636 determining parameters such as agarose concentration [41]. Genetically this  
637 interrelationship was illustrated by abolished twitching motility and natural  
638 transformation competence of *comEC* knockout mutants in *A. baumannii* strains 07-  
639 095 and 07-102, and a defect in surface-associated motility was ascribed for the  
640 ATCC 17978 *comEC::Km* mutant [16]. Deficiency in twitching motility has also been  
641 shown for  $\Delta comEC$  in *Thermus thermophilus* [118]. Our results confirmed surface-  
642 associated motility deficiency in the 29D2 *comEC::Km* mutant strain (Fig. 2).  
643 Deficiency in twitching motility was also shown for  $\Delta comEC$  in *Thermus thermophilus*  
644 [118]. A striking attenuation in *G. mellonella* caterpillar infection for the *comEC::Km*  
645 mutants in both 17978 and 29D2 was observed (Fig. 4), similar to attenuation of

646 *comEC::Km* mutant derivatives of *A. baumannii* strains DSM 30011, 07-102, and 07-  
647 095 [16]. In *Listeria monocytogenes*, *comEC* was demonstrated to be involved in  
648 phagosomal escape, intracellular growth, and virulence [119]. However, *com* genes  
649 have been reported to be involved in bacterial biofilm formation [120], which we could  
650 not confirm for our *comEC::Km* mutant strains (Fig. 2).

651

## 652 **Other genes**

653 The gene *a1s\_0065* encodes a UDP-glucose 4-epimerase (*galE*) and is predicted to  
654 play a role in capsule and lipopolysaccharide biosynthesis [121]. Capsules are  
655 important virulence factors in *A. baumannii* [122]. In this study, a knockout of *galE*  
656 resulted in a reduced motility phenotype in ATCC 17978 and 29D2 (Fig. 1). The  
657 involvement of lipopolysaccharides in *Acinetobacter* surface motility has recently  
658 been shown for the gene *rmlB* which is part of the O-antigen in Gram-negative  
659 bacteria [26]. A proteomic study of *A. baumannii* revealed GalE to be only expressed  
660 in biofilm growth mode [78]. Additionally, multiple studies have revealed that UDP-  
661 glucose 4-epimerases play a role in biofilm formation, including in *Sinorhizobium*  
662 *meliloti* [123], *Vibrio cholerae* [124], *Bacillus subtilis* [125], and *Thermus thermophiles*  
663 [126]. The knockout of *galE* resulted in a significant increase in pellicle biomass  
664 production for both mutants compared to their parental strains (Fig. 2). Similar  
665 observations were also made for a *galE* mutant in *Haemophilus parasuis* [127] and  
666 *Porphyromonas gingivalis* [128]. Moreover, other proteins necessary for the  
667 catabolism of D-galactose (Leloir pathway), GalM and GalU, were found to be  
668 upregulated in *A. baumannii* biofilms [129]. Infection of *G. mellonella* caterpillars with  
669 the *galE::Km* mutants resulted in a significant attenuation. The caterpillar survival rate

670 5 days post infection was 98.9% for the ATCC 17978 *galE::Km* mutant and 95.8% for  
671 29D2 *galE::Km* (Fig. 4). Similarly, a significant decrease in persistence in a mouse  
672 pneumonia model of *A. baumannii* was previously reported for the *a1s\_0065* mutant  
673 [53]. Several other studies demonstrated UDP-glucose 4-epimerases to be involved  
674 in virulence/pathogenesis, for example in *Bacillus anthracis* [130], *Streptococcus*  
675 *iniae* [131], and the plant-pathogenic fungus *Leptosphaeria maculans* [132]. In our  
676 study, we observed a resistance phenotype for the ATCC 17978 *galE::Km* mutant to  
677 ampicillin and tetracycline. By contrast, the 29D2 *galE::Km* mutant showed significant  
678 sensitivity to ampicillin compared to the parental strain (Table 3). The *galE* mutant in  
679 *Porphyromonas gingivalis* was shown to be significantly more susceptible to  
680 benzylpenicillin, oxacillin, cefotaxime, imipenem, and vancomycin compared to the  
681 wildtype [128] and involvement of UDP-glucose 4-epimerases in antibiotic  
682 resistance/sensitivity was reported for several other bacteria [133-135].

683 The gene *a1s\_0806* encodes for an adenosylmethionine-8-amino-7-oxononanoate  
684 aminotransferase (*bioA*), belonging to the acetyl ornithine aminotransferase family,  
685 which is part of the pyridoxal phosphate-dependent aspartate aminotransferase  
686 superfamily. BioA is part of the biotin biosynthesis pathway and biotin is essential for  
687 cell metabolism in prokaryotes and eukaryotes, and only bacteria and plants can  
688 synthesize biotin *de novo* [136-138]. Inactivation of *a1s\_0806* in ATCC 17978  
689 resulted in the strongest surface motility defect (Fig. 1) and the greatest pellicle  
690 biomass production of all tested mutants (Fig. 2). In contrast, the mutant's ability to  
691 kill *G. mellonella* caterpillars was not significantly affected (Suppl. Figs. S6 and S7).  
692 Other studies in *M. tuberculosis* have demonstrated *bioA* to be essential for  
693 establishment of infection and persistence in mice [139].

694 A knockout of gene *a1s\_1055*, encoding a LysM peptidoglycan-binding domain-  
695 containing lytic transglycosylase, resulted in a significantly increased pellicle biomass  
696 production. Similar to our findings, mutation of lytic transglycosylase (A1S\_3027) in  
697 *A. nosocomialis* strain M2 was found to exhibit surface motility deficiency [26].  
698 A1S\_1055 seems to play a role in *A. baumannii* virulence, since mutants of both  
699 parental backgrounds led to attenuation in the *G. mellonella* infection assay (Fig. 4).

700 The gene *a1s\_2761* encodes for a 2-methylaconitate cis-trans isomerase (PrpF),  
701 involved in the 2-methylcitric acid cycle and propionate catabolism. The inactivation  
702 of *prpF* in 17978 resulted in one of the most reduced pellicle formation phenotypes of  
703 all tested mutant strains (Fig. 2), which correlates with the previous finding that PrpF  
704 accumulated in mature 4-days pellicles in 17978 [44]. The mutant's virulence  
705 capacity was not significantly affected (Suppl. Fig. S6). In contrast, the 29D2  
706 *prpF::Km* mutant strain displayed a significant attenuation in the *G. mellonella*  
707 infection model (Fig. 4) but did not affect pellicle biofilm formation (Fig. 2).

708 The *A. baumannii* gene *a1s\_3026* is predicted to encode a secreted ribonuclease T2  
709 family protein (RNase T2-family). In the *A. baumannii* strain 98-37-09 a deficiency in  
710 surface motility for the *a1s\_3026* knockout was previously reported [34]. Additionally,  
711 Jacobs *et al.* indicated that the *a1s\_3026* mutant showed reduced colonization on  
712 abiotic surfaces like glass, polystyrene, and stainless steel, and that the *a1s\_3026*  
713 knockout was shown to be associated with decreased expression of genes involved  
714 in motility and biofilm formation [34]. Despite the deficiency in surface-associated  
715 motility we observed a significant decrease in pellicle biofilm formation (Tables 1 and  
716 2). Interestingly, A1S\_3026 was shown to be involved in *A. baumannii* colistin  
717 resistance [140] and both *3026::Km* mutant strains exhibited elevated resistance  
718 values for ampicillin and imipenem (Table 3).

719 The *A. baumannii* gene *a1s\_3129* encodes for a succinylarginine dihydrolase (*astB*)  
720 and is involved in the arginine succinyltransferase (AST) pathway [141]. In a mouse  
721 pneumonia model of *A. baumannii*, the *astB* insertion caused a significant decrease  
722 in persistence [53]. However, we did not observe a significant attenuation in the *G.*  
723 *mellonella* infection model (Table 1). Furthermore, we observed a significant  
724 reduction of pellicle formation in the *astB::Km* mutant (Fig. 2A). This is in line with an  
725 accumulation of AstB in ATCC 17978 pellicle cells described previously [44].

726

### 727 ***G. mellonella* caterpillar infection**

728 The *G. mellonella* caterpillar, which is an established insect model system for  
729 bacterial infections [142], was used to study virulence traits of the motility-deficient  
730 mutants. A study on virulence and resistance to antibiotic and environmental stress  
731 analyzed 250,000 *A. baumannii* AB5075 transposon mutants for growth within *G.*  
732 *mellonella* larvae, and TnSeq experiments identified 300 genes essential for growth  
733 [111]. When comparing with these results, we could not identify concordant genes in  
734 our library, but we found that main categories of genes do match. For example we  
735 found *galE* to be essential and in AB5075 numerous genes involved in structure and  
736 function of the cell envelopment were found to be required for growth in *G. mellonella*  
737 [111]. Conversely, for example, the *gidA::Km* mutant was not attenuated in *G.*  
738 *mellonella* infection in our study (Suppl. Fig. S6 and Fig. S7), but was stated to be  
739 essential for growth of AB5075 in *G. mellonella* [111]. It is known that AB5075 is  
740 more virulent than ATCC 17978 [143,111], therefore, comparative studies are  
741 needed to unravel strain-specific and species-specific traits.

742

## 743 **Limitations**

744 While our study highlights the need for comparative studies of specific mutant  
745 phenotypes in different strains to distinguish strain-specific from species-specific  
746 traits, it is clear that the two strains studied in detail here do not provide a sufficient  
747 basis to deduce such insight. Such comparative studies in combination with genome-  
748 based analyses may pave the way for the identification of species-specific traits and,  
749 ultimately, novel target sites.

750 The use of marker-based mutagenesis and naturally competent strains to efficiently  
751 generate sets of mutants in different strains has its shortcomings as recombination  
752 events are not necessarily limited to the site of the marker gene. Apart from  
753 homology-based recombination events, transfer of mobile genetic elements and even  
754 illegitimate recombination events may occur [144,145] and could corrupt the mutants'  
755 phenotypes. A few of the mutations described in this study have been partially  
756 characterized previously using additional strains (*ddc*, *dat*, *comEC*, and *aamA* for  
757 example [16,33,112]). However, repetitive construction of the same mutants did not  
758 lead to significant phenotype variation arguing against a high frequency of such  
759 corrupting side-effects. The ability to rapidly reconstruct mutants is an advantage of  
760 this method which can allow for confirmation of mutant phenotypes.

761 Complementation experiments and site-specific deletion mutagenesis would exclude  
762 polar effects of the transposon insertions and help to verify the contribution of each  
763 gene. In support of the specificity of our findings, we found many groups of related  
764 mutants (e.g. purine and pyrimidine biosynthesis) and identified multiple linkages to  
765 motility mutants described in other organisms.



766 We could not achieve a saturated mutant library which indicates that surface-  
767 associated motility is probably under control of additional genes yet to be discovered.  
768 Our attempts were limited by the poor transformability of ATCC 17978 with the  
769 transposome complex, and by the transposition not being completely unbiased so  
770 that we obtained several insertion events repeatedly and independently.

771

## 772 **Conclusion**

773 In this study we made use of a previously generated *A. baumannii* ATCC 17978 EZ-  
774 Tn5<sup>TM</sup> <KAN-2> transposon mutant library [33] to screen for surface-associated  
775 motility-deficient mutants. We identified 30 genes involved in surface motility. All  
776 tested mutants originally identified as motility-deficient in strain ATCC 17978 also  
777 displayed a motility-deficient phenotype in the *A. baumannii* white stork isolate 29D2.  
778 Some of these genes have already been linked to motility in *A. baumannii* (e.g.  
779 *comEC*, *a1s\_0113*, and *a1s\_0116*) or other bacteria (e.g. *carB* and *gidA*), but some  
780 of our findings represent new insights into requirements for surface-associated  
781 motility. Furthermore, we analyzed these mutants with respect to bacterial growth,  
782 pellicle biofilm formation, virulence in *G. mellonella* infection, and antibiotic resistance  
783 and used the naturally competent strain 29D2 to indicate whether the mutations  
784 showed strain-specific or species-specific traits. In summary, we can state that  
785 mutations in genes involved in purine/pyrimidine/folate biosynthesis are essential for  
786 all tested categories. Mutants that targeted RNA modification/regulation seem to  
787 mainly play a role in motility and pellicle formation. The discovery of novel genes  
788 required for surface-associated motility in *A. baumannii* demonstrates that more work  
789 is required to further define its genetic basis.

790

791 **Conflict of Interest**

792 The authors declare that they have no conflict of interest.

793

794 **Figures with legends**

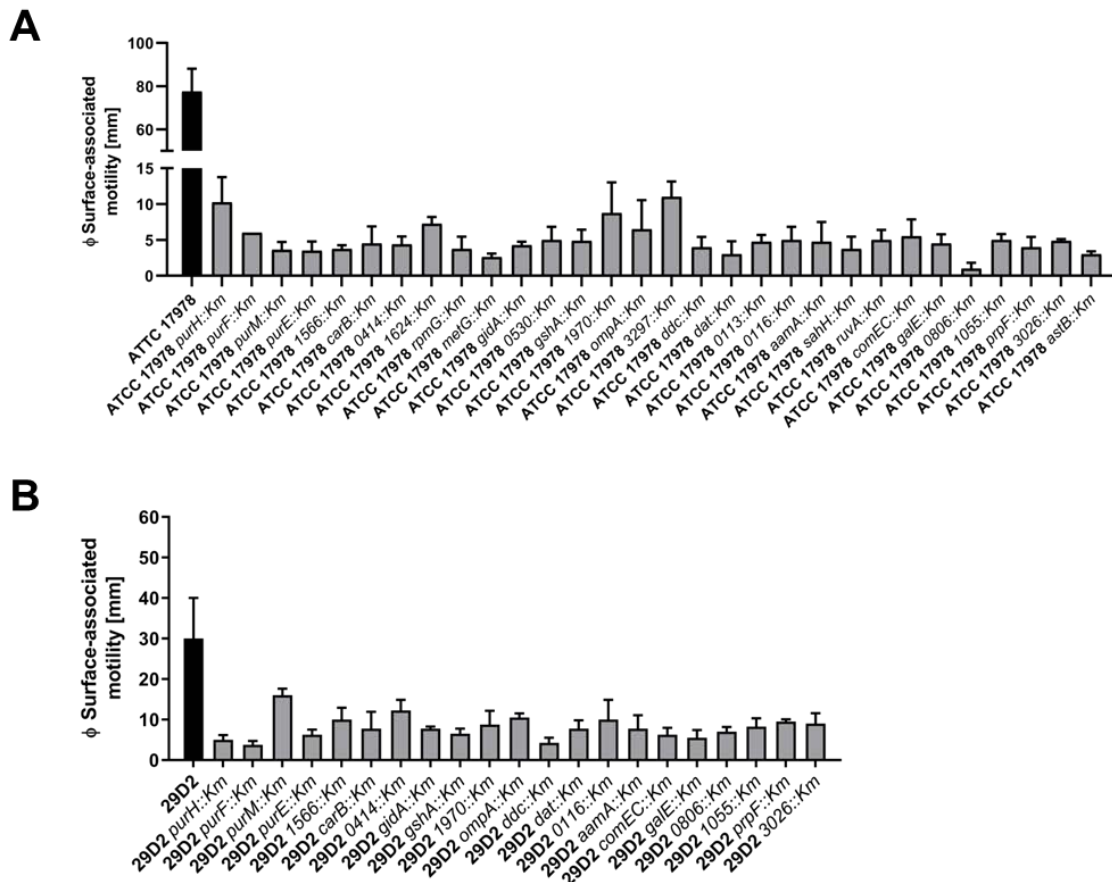

795

796 **Fig. 1. ATCC 17978 mutants (A) and 29D2 mutants (B) deficient in surface-**  
797 **associated motility.** Wildtypes and mutants of strains ATCC 17978 and 29D2 were  
798 inoculated on motility plates. Plates were incubated for 16 h at 37°C. The diameter  
799 ( $\emptyset$ ) of the surface-associated motility spreading zone was measured and triplicates  
800 were statistically analyzed. All mutants of strains ATCC 17978 (A) and 29D2 (B)  
801 displayed a significant motility deficiency compared to their respective parental strain  
802 ( $p$ -value  $\leq 0.05$ ).

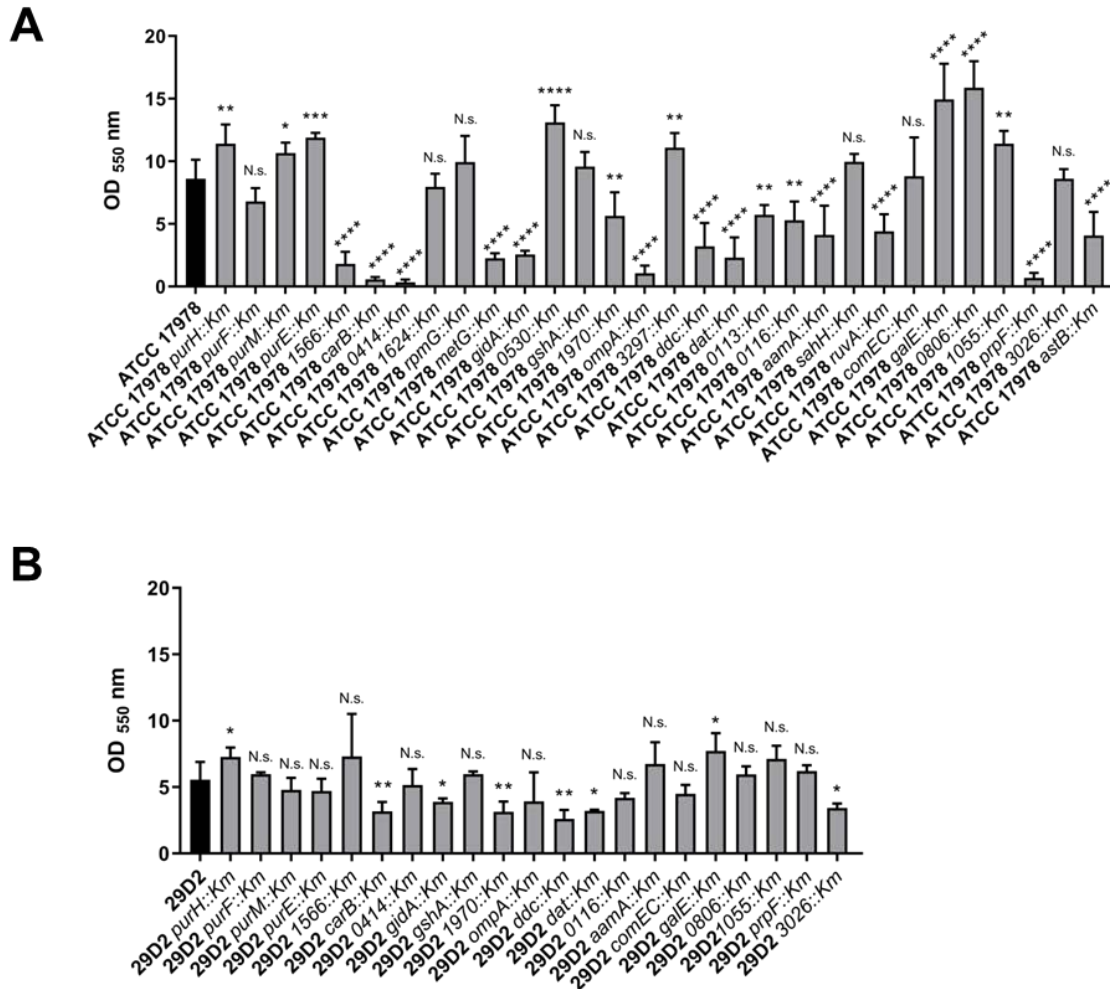

803

804 **Fig. 2. Pellicle biofilm formation of ATCC 17978 wildtype and mutants (A) and**

805 **29D2 wildtype and mutants (B).** A. *baumannii* pellicle biofilms developed within 3

806 days of incubation and were stained with a 0.5% crystal violet solution. The biofilm

807 was scrubbed and flushed off the tube walls and the absorption was determined at

808 550 nm. For each strain 3 independent experiments were performed and statistical

809 significance was analyzed by the Student's *t* test (2-tailed, unpaired). Significance as

810 indicated: \*,  $p$ -value  $\leq 0.05$ ; \*\*,  $p$ -value  $\leq 0.01$ ; \*\*\*,  $p$ -value  $\leq 0.001$ ; \*\*\*\*,  $p$ -value  $\leq$

811 0.0001.

812

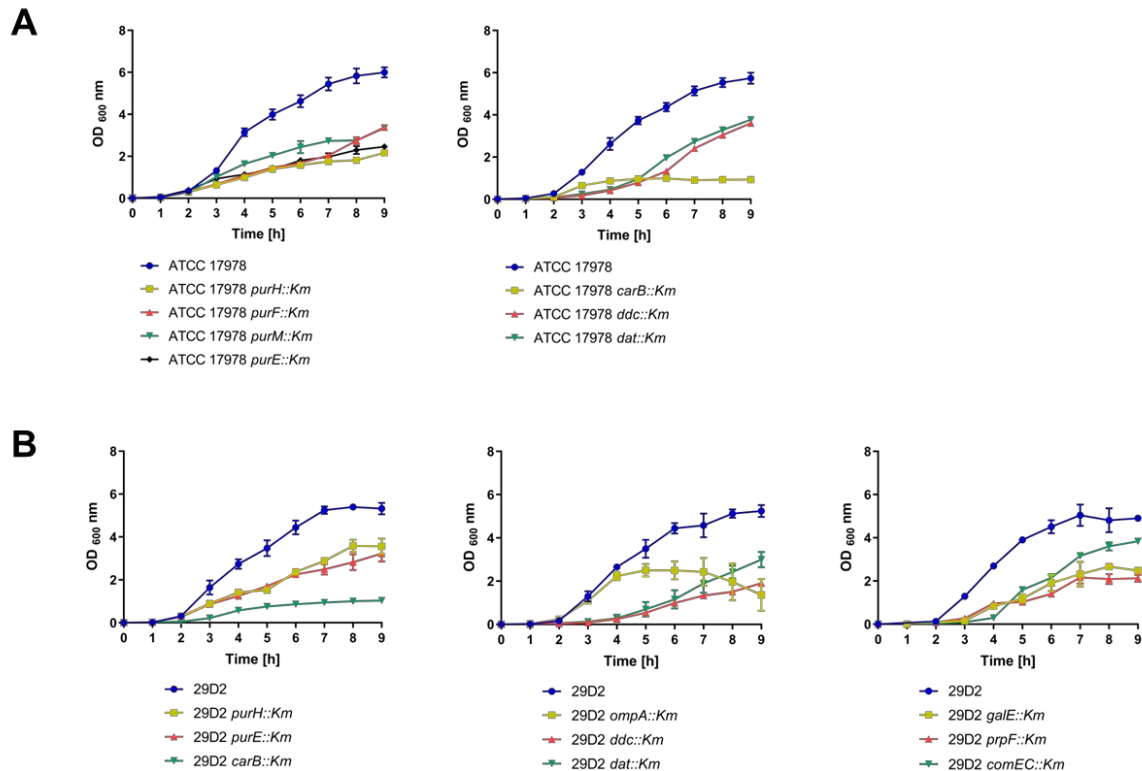

813

814 **Fig. 3. Growth deficiency of mutant strains from ATCC 17978 (A) and 29D2 (B)**

815 **mutant libraries.** OD-adjusted bacterial cultures were grown for 9 h at 37°C under  
816 constant shaking. Every hour cultures were measured at an OD of 600 nm. For each  
817 strain data obtained from 3 independent cultures grown on the same day were  
818 averaged and represented by the mean  $\pm$  SD. Growth defects compared to wildtype  
819 ATCC 17978 were observed for mutants that are involved in purine, pyrimidine, and  
820 diaminopropane biosynthesis (A). In strain 29D2, growth defects were observed for  
821 mutants involved in purine/pyrimidine/folate and diaminopropane biosynthesis, and  
822 for mutants *galE::Km*, *ompA::Km*, and *prpF::Km* (B). See Supplementary Figs. S4  
823 and S5 for growth curves of all strains described in this study.

824

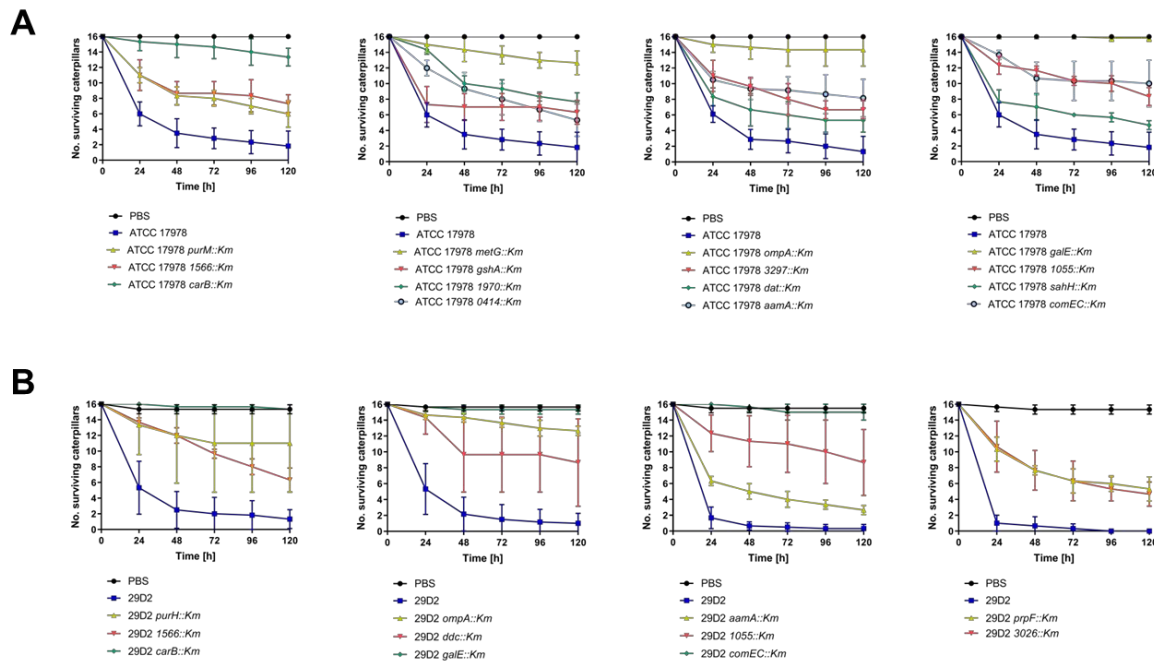

825

826 **Fig. 4. Attenuation of *A. baumannii* ATCC 17978 mutants (A) and 29D2 mutants**

827 **(B) in the *G. mellonella* caterpillar infection model.** Caterpillars were infected with

828  $3 \times 10^5$  CFU of *A. baumannii* strains as indicated. Sterile PBS (black lines) was used

829 as a control. Three independent experiments were performed with groups of 16

830 caterpillars for every bacterial strain and control. Data obtained from 3 independent

831 experiments were averaged and represented by the mean  $\pm$  SD. In strain ATCC

832 17978, 15 of 30 mutants showed a significant attenuation at 5 days post-infection

833 (see Table 1 for p-values) compared to the wildtype strain (A). In strain 29D2, 11 of

834 21 mutants were attenuated (see Table 2 for p-values) in the *G. mellonella* infection

835 model (B). See Supplementary Figs. S6 and S7 for infection data of all strains

836 described in this study.

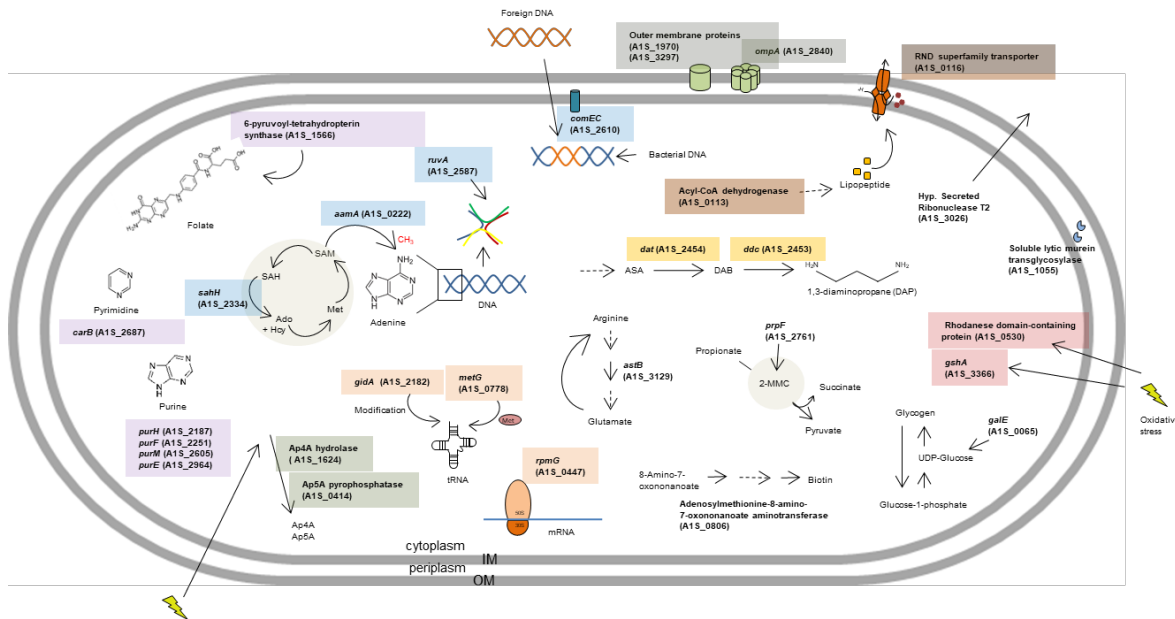

837

838 **Fig. 5 Genes inactivated in *A. baumannii* ATCC 17978 mutants with a surface-**  
 839 **associated motility defect and their known/predicted/putative function in the**  
 840 **bacterial cell.** A common color code indicates that mutants belong to the same  
 841 functional, processual, and/or structural category. OM, outer membrane; IM, inner  
 842 membrane; Ap4A, diadenosine tetraphosphate; Ap5A, diadenosine pentaphosphate;  
 843 SAM, S-adenosyl-L-methionine; SAH, S-adenosylhomocysteine; Ado, adenosine;  
 844 Hcy, homocysteine; Met, methionine; ASA, L-aspartate 4-semialdehyde; DAB, L-2,4-  
 845 diaminobutanoate; 2-MMC, 2-methylcitric acid cycle.

846

847

## 848 References

- 849 1. Baumann P (1968) Isolation of *Acinetobacter* from soil and water. *J Bacteriol* 96 (1):39-42
- 850 2. Peleg AY, Seifert H, Paterson DL (2008) *Acinetobacter baumannii*: emergence of a successful  
851 pathogen. *Clin Microbiol Rev* 21 (3):538-582. doi:10.1128/CMR.00058-07
- 852 3. Harding CM, Hennon SW, Feldman MF (2018) Uncovering the mechanisms of *Acinetobacter*  
853 *baumannii* virulence. *Nat Rev Microbiol* 16 (2):91-102. doi:10.1038/nrmicro.2017.148
- 854 4. Vincent JL, Rello J, Marshall J, Silva E, Anzueto A, Martin CD, Moreno R, Lipman J, Gomersall C, Sakr  
855 Y, Reinhart K, Investigators EICo (2009) International study of the prevalence and outcomes of  
856 infection in intensive care units. *JAMA* 302 (21):2323-2329. doi:10.1001/jama.2009.1754
- 857 5. Landman D, Bratu S, Kochar S, Panwar M, Trehan M, Doymaz M, Quale J (2007) Evolution of  
858 antimicrobial resistance among *Pseudomonas aeruginosa*, *Acinetobacter baumannii* and  
859 *Klebsiella pneumoniae* in Brooklyn, NY. *J Antimicrob Chemother* 60 (1):78-82.  
860 doi:10.1093/jac/dkm129
- 861 6. Tognim MC, Andrade SS, Silbert S, Gales AC, Jones RN, Sader HS (2004) Resistance trends of  
862 *Acinetobacter* spp. in Latin America and characterization of international dissemination of multi-  
863 drug resistant strains: five-year report of the SENTRY Antimicrobial Surveillance Program. *Int J*  
864 *Infect Dis* 8 (5):284-291. doi:10.1016/j.ijid.2003.11.009
- 865 7. Giammanco A, Cala C, Fasciana T, Dowzicky MJ (2017) Global Assessment of the Activity of  
866 Tigecycline against Multidrug-Resistant Gram-Negative Pathogens between 2004 and 2014 as  
867 Part of the Tigecycline Evaluation and Surveillance Trial. *mSphere* 2 (1).  
868 doi:10.1128/mSphere.00310-16
- 869 8. Tacconelli E, Carrara E, Savoldi A, Harbarth S, Mendelson M, Monnet DL, Pulcini C, Kahlmeter G,  
870 Kluytmans J, Carmeli Y, Ouellette M, Outtersson K, Patel J, Cavaleri M, Cox EM, Houchens CR,  
871 Grayson ML, Hansen P, Singh N, Theuretzbacher U, Magrini N, Group WHOPPLW (2018)  
872 Discovery, research, and development of new antibiotics: the WHO priority list of antibiotic-  
873 resistant bacteria and tuberculosis. *Lancet Infect Dis* 18 (3):318-327. doi:10.1016/S1473-  
874 3099(17)30753-3
- 875 9. Roca I, Espinal P, Vila-Farres X, Vila J (2012) The *Acinetobacter baumannii* Oxymoron: Commensal  
876 Hospital Dweller Turned Pan-Drug-Resistant Menace. *Front Microbiol* 3:148.  
877 doi:10.3389/fmicb.2012.00148
- 878 10. Giannouli M, Antunes LC, Marchetti V, Triassi M, Visca P, Zarrilli R (2013) Virulence-related traits  
879 of epidemic *Acinetobacter baumannii* strains belonging to the international clonal lineages I-III  
880 and to the emerging genotypes ST25 and ST78. *BMC Infect Dis* 13:282. doi:10.1186/1471-2334-  
881 13-282



- 882 11. Antunes LC, Imperi F, Carattoli A, Visca P (2011) Deciphering the multifactorial nature of  
883 *Acinetobacter baumannii* pathogenicity. PLoS One 6 (8):e22674.  
884 doi:10.1371/journal.pone.0022674
- 885 12. Jawad A, Seifert H, Snelling AM, Heritage J, Hawkey PM (1998) Survival of *Acinetobacter*  
886 *baumannii* on dry surfaces: comparison of outbreak and sporadic isolates. J Clin Microbiol 36  
887 (7):1938-1941
- 888 13. Wagenvoort JH, Joosten EJ (2002) An outbreak *Acinetobacter baumannii* that mimics MRSA in its  
889 environmental longevity. J Hosp Infect 52 (3):226-227. doi:10.1053/jhin.2001.1294
- 890 14. Greene C, Vadlamudi G, Newton D, Foxman B, Xi C (2016) The influence of biofilm formation and  
891 multidrug resistance on environmental survival of clinical and environmental isolates of  
892 *Acinetobacter baumannii*. Am J Infect Control 44 (5):e65-71. doi:10.1016/j.ajic.2015.12.012
- 893 15. Eijkelkamp BA, Stroehler UH, Hassan KA, Elbourne LD, Paulsen IT, Brown MH (2013) H-NS plays a  
894 role in expression of *Acinetobacter baumannii* virulence features. Infect Immun 81 (7):2574-  
895 2583. doi:10.1128/IAI.00065-13
- 896 16. Wilharm G, Piesker J, Laue M, Skiebe E (2013) DNA uptake by the nosocomial pathogen  
897 *Acinetobacter baumannii* occurs during movement along wet surfaces. J Bacteriol 195 (18):4146-  
898 4153. doi:10.1128/JB.00754-13
- 899 17. Harding CM, Tracy EN, Carruthers MD, Rather PN, Actis LA, Munson RS, Jr. (2013) *Acinetobacter*  
900 *baumannii* strain M2 produces type IV pili which play a role in natural transformation and  
901 twitching motility but not surface-associated motility. MBio 4 (4). doi:10.1128/mBio.00360-13
- 902 18. Harshey RM (2003) Bacterial motility on a surface: many ways to a common goal. Annu Rev  
903 Microbiol 57:249-273. doi:10.1146/annurev.micro.57.030502.091014
- 904 19. Jarrell KF, McBride MJ (2008) The surprisingly diverse ways that prokaryotes move. Nat Rev  
905 Microbiol 6 (6):466-476. doi:10.1038/nrmicro1900
- 906 20. Mattick JS (2002) Type IV pili and twitching motility. Annu Rev Microbiol 56:289-314.  
907 doi:10.1146/annurev.micro.56.012302.160938
- 908 21. Merz AJ, So M, Sheetz MP (2000) Pilus retraction powers bacterial twitching motility. Nature 407  
909 (6800):98-102. doi:10.1038/35024105
- 910 22. Skerker JM, Berg HC (2001) Direct observation of extension and retraction of type IV pili. Proc  
911 Natl Acad Sci U S A 98 (12):6901-6904. doi:10.1073/pnas.121171698
- 912 23. Wall D, Kaiser D (1999) Type IV pili and cell motility. Mol Microbiol 32 (1):1-10.  
913 doi:10.1046/j.1365-2958.1999.01339.x
- 914 24. Henrichsen J (1984) Not gliding but twitching motility of *Acinetobacter calcoaceticus*. J Clin Pathol  
915 37 (1):102-103. doi:10.1136/jcp.37.1.102-b

- 916 25. McBride MJ (2010) Shining a light on an opportunistic pathogen. *J Bacteriol* 192 (24):6325-6326.  
917 doi:10.1128/JB.01141-10
- 918 26. Clemmer KM, Bonomo RA, Rather PN (2011) Genetic analysis of surface motility in *Acinetobacter*  
919 *baumannii*. *Microbiology* 157 (Pt 9):2534-2544. doi:10.1099/mic.0.049791-0
- 920 27. Henrichsen J, Blom J (1975) Correlation between twitching motility and possession of polar  
921 fimbriae in *Acinetobacter calcoaceticus*. *Acta Pathol Microbiol Scand B* 83 (2):103-115.  
922 doi:10.1111/j.1699-0463.1975.tb00078.x
- 923 28. Eijkelkamp BA, Stroehler UH, Hassan KA, Papadimitriou MS, Paulsen IT, Brown MH (2011)  
924 Adherence and motility characteristics of clinical *Acinetobacter baumannii* isolates. *FEMS*  
925 *Microbiol Lett* 323 (1):44-51. doi:10.1111/j.1574-6968.2011.02362.x
- 926 29. Barker J, Maxted H (1975) Observations on the growth and movement of *Acinetobacter* on semi-  
927 solid media. *J Med Microbiol* 8 (3):443-446. doi:10.1099/00222615-8-3-443
- 928 30. Mussi MA, Gaddy JA, Cabruja M, Arivett BA, Viale AM, Rasia R, Actis LA (2010) The opportunistic  
929 human pathogen *Acinetobacter baumannii* senses and responds to light. *J Bacteriol* 192  
930 (24):6336-6345. doi:10.1128/JB.00917-10
- 931 31. Eijkelkamp BA, Hassan KA, Paulsen IT, Brown MH (2011) Investigation of the human pathogen  
932 *Acinetobacter baumannii* under iron limiting conditions. *BMC Genomics* 12:126.  
933 doi:10.1186/1471-2164-12-126
- 934 32. McQueary CN, Kirkup BC, Si Y, Barlow M, Actis LA, Craft DW, Zurawski DV (2012) Extracellular  
935 stress and lipopolysaccharide modulate *Acinetobacter baumannii* surface-associated motility. *J*  
936 *Microbiol* 50 (3):434-443. doi:10.1007/s12275-012-1555-1
- 937 33. Skiebe E, de Berardinis V, Morczinek P, Kerrinnes T, Faber F, Lepka D, Hammer B, Zimmermann O,  
938 Ziesing S, Wichelhaus TA, Hunfeld KP, Borgmann S, Grobner S, Higgins PG, Seifert H, Busse HJ,  
939 Witte W, Pfeifer Y, Wilharm G (2012) Surface-associated motility, a common trait of clinical  
940 isolates of *Acinetobacter baumannii*, depends on 1,3-diaminopropane. *Int J Med Microbiol* 302  
941 (3):117-128. doi:10.1016/j.ijmm.2012.03.003
- 942 34. Jacobs AC, Blanchard CE, Catherman SC, Dunman PM, Murata Y (2014) An ribonuclease T2 family  
943 protein modulates *Acinetobacter baumannii* abiotic surface colonization. *PLoS One* 9  
944 (1):e85729. doi:10.1371/journal.pone.0085729
- 945 35. Heindorf M, Kadari M, Heider C, Skiebe E, Wilharm G (2014) Impact of *Acinetobacter baumannii*  
946 superoxide dismutase on motility, virulence, oxidative stress resistance and susceptibility to  
947 antibiotics. *PLoS One* 9 (7):e101033. doi:10.1371/journal.pone.0101033

- 948 36. Ahmad I, Nygren E, Khalid F, Myint SL, Uhlin BE (2020) A Cyclic-di-GMP signalling network  
949 regulates biofilm formation and surface associated motility of *Acinetobacter baumannii* 17978.  
950 *Sci Rep* 10 (1):1991. doi:10.1038/s41598-020-58522-5
- 951 37. Tipton KA, Rather PN (2017) An ompR-envZ Two-Component System Ortholog Regulates Phase  
952 Variation, Osmotic Tolerance, Motility, and Virulence in *Acinetobacter baumannii* Strain AB5075.  
953 *J Bacteriol* 199 (3). doi:10.1128/JB.00705-16
- 954 38. Tipton KA, Dimitrova D, Rather PN (2015) Phase-Variable Control of Multiple Phenotypes in  
955 *Acinetobacter baumannii* Strain AB5075. *J Bacteriol* 197 (15):2593-2599. doi:10.1128/JB.00188-  
956 15
- 957 39. Giles SK, Stroehler UH, Eijkelkamp BA, Brown MH (2015) Identification of genes essential for  
958 pellicle formation in *Acinetobacter baumannii*. *BMC Microbiol* 15:116. doi:10.1186/s12866-015-  
959 0440-6
- 960 40. Wilharm G, Skiebe E, Higgins PG, Poppel MT, Blaschke U, Leser S, Heider C, Heindorf M, Brauner  
961 P, Jackel U, Bohland K, Cuny C, Lopinska A, Kaminski P, Kasprzak M, Bochenski M, Ciebiera O,  
962 Tobolka M, Zolnierowicz KM, Siekiera J, Seifert H, Gagne S, Salcedo SP, Kaatz M, Layer F, Bender  
963 JK, Fuchs S, Semmler T, Pfeifer Y, Jerzak L (2017) Relatedness of wildlife and livestock avian  
964 isolates of the nosocomial pathogen *Acinetobacter baumannii* to lineages spread in hospitals  
965 worldwide. *Environ Microbiol* 19 (10):4349-4364. doi:10.1111/1462-2920.13931
- 966 41. Godeux AS, Lupo A, Haenni M, Guette-Marquet S, Wilharm G, Laaberki MH, Charpentier X (2018)  
967 Fluorescence-Based Detection of Natural Transformation in Drug-Resistant *Acinetobacter*  
968 *baumannii*. *J Bacteriol* 200 (19). doi:10.1128/JB.00181-18
- 969 42. Ahmad I, Karah N, Nadeem A, Wai SN, Uhlin BE (2019) Analysis of colony phase variation switch in  
970 *Acinetobacter baumannii* clinical isolates. *PLoS One* 14 (1):e0210082.  
971 doi:10.1371/journal.pone.0210082
- 972 43. Choi KH, Kumar A, Schweizer HP (2006) A 10-min method for preparation of highly  
973 electrocompetent *Pseudomonas aeruginosa* cells: application for DNA fragment transfer  
974 between chromosomes and plasmid transformation. *J Microbiol Methods* 64 (3):391-397.  
975 doi:10.1016/j.mimet.2005.06.001
- 976 44. Kentache T, Ben Abdelkrim A, Jouenne T, De E, Hardouin J (2017) Global Dynamic Proteome  
977 Study of a Pellicle-forming *Acinetobacter baumannii* Strain. *Mol Cell Proteomics* 16 (1):100-112.  
978 doi:10.1074/mcp.M116.061044
- 979 45. Nait Chabane Y, Marti S, Rihouey C, Alexandre S, Hardouin J, Lesouhaitier O, Vila J, Kaplan JB,  
980 Jouenne T, De E (2014) Characterisation of pellicles formed by *Acinetobacter baumannii* at the  
981 air-liquid interface. *PLoS One* 9 (10):e111660. doi:10.1371/journal.pone.0111660

- 982 46. Kinsinger RF, Kearns DB, Hale M, Fall R (2005) Genetic requirements for potassium ion-dependent  
983 colony spreading in *Bacillus subtilis*. *J Bacteriol* 187 (24):8462-8469. doi:10.1128/JB.187.24.8462-  
984 8469.2005
- 985 47. Yan F, Yu Y, Gozzi K, Chen Y, Guo JH, Chai Y (2017) Genome-Wide Investigation of Biofilm  
986 Formation in *Bacillus cereus*. *Appl Environ Microbiol* 83 (13). doi:10.1128/AEM.00561-17
- 987 48. Okshevsky M, Louw MG, Lamela EO, Nilsson M, Tolker-Nielsen T, Meyer RL (2018) A transposon  
988 mutant library of *Bacillus cereus* ATCC 10987 reveals novel genes required for biofilm formation  
989 and implicates motility as an important factor for pellicle-biofilm formation. *Microbiologyopen* 7  
990 (2):e00552. doi:10.1002/mbo3.552
- 991 49. Vilain S, Pretorius JM, Theron J, Brozel VS (2009) DNA as an adhesin: *Bacillus cereus* requires  
992 extracellular DNA to form biofilms. *Appl Environ Microbiol* 75 (9):2861-2868.  
993 doi:10.1128/AEM.01317-08
- 994 50. Zhang X, de Maat V, Guzman Prieto AM, Prajsnar TK, Bayjanov JR, de Been M, Rogers MRC,  
995 Bonten MJM, Mesnage S, Willems RJL, van Schaik W (2017) RNA-seq and Tn-seq reveal fitness  
996 determinants of vancomycin-resistant *Enterococcus faecium* during growth in human serum.  
997 *BMC Genomics* 18 (1):893. doi:10.1186/s12864-017-4299-9
- 998 51. Samant S, Lee H, Ghassemi M, Chen J, Cook JL, Mankin AS, Neyfakh AA (2008) Nucleotide  
999 biosynthesis is critical for growth of bacteria in human blood. *PLoS Pathog* 4 (2):e37.  
1000 doi:10.1371/journal.ppat.0040037
- 1001 52. Schwager S, Agnoli K, Kothe M, Feldmann F, Givskov M, Carlier A, Eberl L (2013) Identification of  
1002 *Burkholderia cenocepacia* strain H111 virulence factors using nonmammalian infection hosts.  
1003 *Infect Immun* 81 (1):143-153. doi:10.1128/IAI.00768-12
- 1004 53. Wang N, Ozer EA, Mandel MJ, Hauser AR (2014) Genome-wide identification of *Acinetobacter*  
1005 *baumannii* genes necessary for persistence in the lung. *MBio* 5 (3):e01163-01114.  
1006 doi:10.1128/mBio.01163-14
- 1007 54. Polissi A, Pontiggia A, Feger G, Altieri M, Mottl H, Ferrari L, Simon D (1998) Large-scale  
1008 identification of virulence genes from *Streptococcus pneumoniae*. *Infect Immun* 66 (12):5620-  
1009 5629
- 1010 55. Jenkins A, Cote C, Twenhafel N, Merkel T, Bozue J, Welkos S (2011) Role of purine biosynthesis in  
1011 *Bacillus anthracis* pathogenesis and virulence. *Infect Immun* 79 (1):153-166.  
1012 doi:10.1128/IAI.00925-10
- 1013 56. Fuller TE, Kennedy MJ, Lowery DE (2000) Identification of *Pasteurella multocida* virulence genes  
1014 in a septicemic mouse model using signature-tagged mutagenesis. *Microb Pathog* 29 (1):25-38.  
1015 doi:10.1006/mpat.2000.0365

- 1016 57. Yee R, Cui P, Shi W, Feng J, Zhang Y (2015) Genetic Screen Reveals the Role of Purine Metabolism  
1017 in *Staphylococcus aureus* Persistence to Rifampicin. *Antibiotics (Basel)* 4 (4):627-642.  
1018 doi:10.3390/antibiotics4040627
- 1019 58. Charlier D, Nguyen Le Minh P, Roovers M (2018) Regulation of carbamoylphosphate synthesis in  
1020 *Escherichia coli*: an amazing metabolite at the crossroad of arginine and pyrimidine biosynthesis.  
1021 *Amino Acids* 50 (12):1647-1661. doi:10.1007/s00726-018-2654-z
- 1022 59. Ueda A, Attila C, Whiteley M, Wood TK (2009) Uracil influences quorum sensing and biofilm  
1023 formation in *Pseudomonas aeruginosa* and fluorouracil is an antagonist. *Microb Biotechnol* 2  
1024 (1):62-74. doi:10.1111/j.1751-7915.2008.00060.x
- 1025 60. Garavaglia M, Rossi E, Landini P (2012) The pyrimidine nucleotide biosynthetic pathway  
1026 modulates production of biofilm determinants in *Escherichia coli*. *PLoS One* 7 (2):e31252.  
1027 doi:10.1371/journal.pone.0031252
- 1028 61. Beaume M, Kohler T, Fontana T, Tognon M, Renzoni A, van Delden C (2015) Metabolic pathways  
1029 of *Pseudomonas aeruginosa* involved in competition with respiratory bacterial pathogens. *Front*  
1030 *Microbiol* 6:321. doi:10.3389/fmicb.2015.00321
- 1031 62. Zhuo T, Rou W, Song X, Guo J, Fan X, Kamau GG, Zou H (2015) Molecular study on the *carAB*  
1032 operon reveals that *carB* gene is required for swimming and biofilm formation in *Xanthomonas*  
1033 *citri* subsp. *citri*. *BMC Microbiol* 15:225. doi:10.1186/s12866-015-0555-9
- 1034 63. Kisselev LL, Justesen J, Wolfson AD, Frolova LY (1998) Diadenosine oligophosphates (Ap(n)A), a  
1035 novel class of signalling molecules? *FEBS Lett* 427 (2):157-163. doi:10.1016/s0014-  
1036 5793(98)00420-7
- 1037 64. Bochner BR, Lee PC, Wilson SW, Cutler CW, Ames BN (1984) Appppa and Related Adenylylated  
1038 Nucleotides Are Synthesized as a Consequence of Oxidation Stress. *Cell* 37 (1):225-232. doi:Doi  
1039 10.1016/0092-8674(84)90318-0
- 1040 65. Linster CL, Van Schaftingen E, Hanson AD (2013) Metabolite damage and its repair or pre-  
1041 emption. *Nat Chem Biol* 9 (2):72-80. doi:10.1038/nchembio.1141
- 1042 66. Despotovic D, Brandis A, Savidor A, Levin Y, Fumagalli L, Tawfik DS (2017) Diadenosine  
1043 tetraphosphate (Ap4A) - an *E. coli* alarmone or a damage metabolite? *FEBS J* 284 (14):2194-  
1044 2215. doi:10.1111/febs.14113
- 1045 67. Hudecek O, Benoni R, Reyes-Gutierrez PE, Culka M, Sanderova H, Hubalek M, Rulisek L, Cvacka J,  
1046 Krasny L, Cahova H (2020) Dinucleoside polyphosphates act as 5'-RNA caps in bacteria. *Nat*  
1047 *Commun* 11 (1):1052. doi:10.1038/s41467-020-14896-8

- 1048 68. Farr SB, Arnosti DN, Chamberlin MJ, Ames BN (1989) An *apaH* mutation causes AppppA to  
1049 accumulate and affects motility and catabolite repression in *Escherichia coli*. *Proc Natl Acad Sci*  
1050 *U S A* 86 (13):5010-5014. doi:10.1073/pnas.86.13.5010
- 1051 69. Ismail TM, Hart CA, McLennan AG (2003) Regulation of dinucleoside polyphosphate pools by the  
1052 YgdP and ApaH hydrolases is essential for the ability of *Salmonella enterica* serovar typhimurium  
1053 to invade cultured mammalian cells. *J Biol Chem* 278 (35):32602-32607.  
1054 doi:10.1074/jbc.M305994200
- 1055 70. Ji X, Zou J, Peng H, Stolle AS, Xie R, Zhang H, Peng B, Mekalanos JJ, Zheng J (2019) Alarmone Ap4A  
1056 is elevated by aminoglycoside antibiotics and enhances their bactericidal activity. *Proc Natl Acad*  
1057 *Sci U S A* 116 (19):9578-9585. doi:10.1073/pnas.1822026116
- 1058 71. Hansen S, Lewis K, Vulic M (2008) Role of global regulators and nucleotide metabolism in  
1059 antibiotic tolerance in *Escherichia coli*. *Antimicrob Agents Chemother* 52 (8):2718-2726.  
1060 doi:10.1128/AAC.00144-08
- 1061 72. Monds RD, Newell PD, Wagner JC, Schwartzman JA, Lu W, Rabinowitz JD, O'Toole GA (2010) Di-  
1062 adenosine tetraphosphate (Ap4A) metabolism impacts biofilm formation by *Pseudomonas*  
1063 *fluorescens* via modulation of c-di-GMP-dependent pathways. *J Bacteriol* 192 (12):3011-3023.  
1064 doi:10.1128/JB.01571-09
- 1065 73. Goerlich O, Foeckler R, Holler E (1982) Mechanism of synthesis of  
1066 adenosine(5')tetraphospho(5')adenosine (AppppA) by aminoacyl-tRNA synthetases. *Eur J*  
1067 *Biochem* 126 (1):135-142. doi:10.1111/j.1432-1033.1982.tb06757.x
- 1068 74. Fraga H, Fontes R (2011) Enzymatic synthesis of mono and dinucleoside polyphosphates. *Biochim*  
1069 *Biophys Acta* 1810 (12):1195-1204. doi:10.1016/j.bbagen.2011.09.010
- 1070 75. Petersen LM, Tisa LS (2014) Molecular characterization of protease activity in *Serratia* sp. strain  
1071 SCBI and its importance in cytotoxicity and virulence. *J Bacteriol* 196 (22):3923-3936.  
1072 doi:10.1128/JB.01908-14
- 1073 76. Kinscherf TG, Willis DK (2002) Global regulation by *gidA* in *Pseudomonas syringae*. *J Bacteriol* 184  
1074 (8):2281-2286. doi:10.1128/jb.184.8.2281-2286.2002
- 1075 77. Shippy DC, Fadl AA (2015) RNA modification enzymes encoded by the *gid* operon: Implications in  
1076 biology and virulence of bacteria. *Microb Pathog* 89:100-107.  
1077 doi:10.1016/j.micpath.2015.09.008
- 1078 78. Shin JH, Lee HW, Kim SM, Kim J (2009) Proteomic analysis of *Acinetobacter baumannii* in biofilm  
1079 and planktonic growth mode. *J Microbiol* 47 (6):728-735. doi:10.1007/s12275-009-0158-y

- 1080 79. Zhang W, Zhao Z, Zhang B, Wu XG, Ren ZG, Zhang LQ (2014) Posttranscriptional regulation of 2,4-  
1081 diacetylphloroglucinol production by GidA and TrmE in *Pseudomonas fluorescens* 2P24. *Appl*  
1082 *Environ Microbiol* 80 (13):3972-3981. doi:10.1128/AEM.00455-14
- 1083 80. Li D, Shibata Y, Takeshita T, Yamashita Y (2014) A novel gene involved in the survival of  
1084 *Streptococcus mutans* under stress conditions. *Appl Environ Microbiol* 80 (1):97-103.  
1085 doi:10.1128/AEM.02549-13
- 1086 81. Yi H, Lee H, Cho KH, Kim HS (2018) Mutations in MetG (methionyl-tRNA synthetase) and TrmD  
1087 [tRNA (guanine-N1)-methyltransferase] conferring meropenem tolerance in *Burkholderia*  
1088 *thailandensis*. *J Antimicrob Chemother* 73 (2):332-338. doi:10.1093/jac/dkx378
- 1089 82. Brauner A, Fridman O, Gefen O, Balaban NQ (2016) Distinguishing between resistance, tolerance  
1090 and persistence to antibiotic treatment. *Nat Rev Microbiol* 14 (5):320-330.  
1091 doi:10.1038/nrmicro.2016.34
- 1092 83. Fridman O, Goldberg A, Ronin I, Shores N, Balaban NQ (2014) Optimization of lag time underlies  
1093 antibiotic tolerance in evolved bacterial populations. *Nature* 513 (7518):418-421.  
1094 doi:10.1038/nature13469
- 1095 84. Bolt EL, Jenkins T, Russo VM, Ahmed S, Cavey J, Cass SD (2015) Identification of *Escherichia coli*  
1096 *ygaQ* and *rpmG* as novel mitomycin C resistance factors implicated in DNA repair. *Biosci Rep* 36  
1097 (1):e00290. doi:10.1042/BSR20150249
- 1098 85. Smirnova GV, Oktyabrsky ON (2005) Glutathione in bacteria. *Biochemistry (Mosc)* 70 (11):1199-  
1099 1211. doi:10.1007/s10541-005-0248-3
- 1100 86. Jamieson DJ (1998) Oxidative stress responses of the yeast *Saccharomyces cerevisiae*. *Yeast* 14  
1101 (16):1511-1527. doi:10.1002/(SICI)1097-0061(199812)14:16<1511::AID-YEA356>3.0.CO;2-S
- 1102 87. Van Laar TA, Esani S, Birges TJ, Hazen B, Thomas JM, Rawat M (2018) *Pseudomonas aeruginosa*  
1103 *gshA* Mutant Is Defective in Biofilm Formation, Swarming, and Pyocyanin Production. *mSphere* 3  
1104 (2). doi:10.1128/mSphere.00155-18
- 1105 88. Wongsaroj L, Saninjuk K, Romsang A, Duang-Nkern J, Trinachartvanit W, Vattanaviboon P,  
1106 Mongkolsuk S (2018) *Pseudomonas aeruginosa* glutathione biosynthesis genes play multiple  
1107 roles in stress protection, bacterial virulence and biofilm formation. *PLoS One* 13 (10):e0205815.  
1108 doi:10.1371/journal.pone.0205815
- 1109 89. Gomez MJ, Neyfakh AA (2006) Genes involved in intrinsic antibiotic resistance of *Acinetobacter*  
1110 *baylyi*. *Antimicrob Agents Chemother* 50 (11):3562-3567. doi:10.1128/AAC.00579-06
- 1111 90. Feinbaum RL, Urbach JM, Liberati NT, Djonovic S, Adonizio A, Carvunis AR, Ausubel FM (2012)  
1112 Genome-wide identification of *Pseudomonas aeruginosa* virulence-related genes using a

- 1113 Caenorhabditis elegans infection model. PLoS Pathog 8 (7):e1002813.  
1114 doi:10.1371/journal.ppat.1002813
- 1115 91. Song M, Husain M, Jones-Carson J, Liu L, Henard CA, Vazquez-Torres A (2013) Low-molecular-  
1116 weight thiol-dependent antioxidant and antinitrosative defences in Salmonella pathogenesis.  
1117 Mol Microbiol 87 (3):609-622. doi:10.1111/mmi.12119
- 1118 92. Westley J (1981) Thiosulfate: cyanide sulfurtransferase (rhodanese). Methods Enzymol 77:285-  
1119 291. doi:10.1016/s0076-6879(81)77039-3
- 1120 93. Donadio S, Shafiee A, Hutchinson CR (1990) Disruption of a rhodaneselike gene results in cysteine  
1121 auxotrophy in Saccharopolyspora erythraea. J Bacteriol 172 (1):350-360.  
1122 doi:10.1128/jb.172.1.350-360.1990
- 1123 94. Pagani S, Bonomi F, Cerletti P (1984) Enzymic synthesis of the iron-sulfur cluster of spinach  
1124 ferredoxin. Eur J Biochem 142 (2):361-366. doi:10.1111/j.1432-1033.1984.tb08295.x
- 1125 95. Bonomi F, Pagani S, Kurtz DM, Jr. (1985) Enzymic synthesis of the 4Fe-4S clusters of Clostridium  
1126 pasteurianum ferredoxin. Eur J Biochem 148 (1):67-73. doi:10.1111/j.1432-1033.1985.tb08808.x
- 1127 96. Navidifar T, Amin M, Rashno M (2019) Effects of sub-inhibitory concentrations of meropenem  
1128 and tigecycline on the expression of genes regulating pili, efflux pumps and virulence factors  
1129 involved in biofilm formation by Acinetobacter baumannii. Infect Drug Resist 12:1099-1111.  
1130 doi:10.2147/IDR.S199993
- 1131 97. Yang CH, Su PW, Moi SH, Chuang LY (2019) Biofilm Formation in Acinetobacter Baumannii:  
1132 Genotype-Phenotype Correlation. Molecules 24 (10). doi:10.3390/molecules24101849
- 1133 98. Gaddy JA, Tomaras AP, Actis LA (2009) The Acinetobacter baumannii 19606 OmpA protein plays a  
1134 role in biofilm formation on abiotic surfaces and in the interaction of this pathogen with  
1135 eukaryotic cells. Infect Immun 77 (8):3150-3160. doi:10.1128/IAI.00096-09
- 1136 99. Confer AW, Ayalew S (2013) The OmpA family of proteins: roles in bacterial pathogenesis and  
1137 immunity. Vet Microbiol 163 (3-4):207-222. doi:10.1016/j.vetmic.2012.08.019
- 1138 100. Skerniskyte J, Karazijaite E, Deschamps J, Krasauskas R, Briandet R, Suziedeliene E (2019) The  
1139 Mutation of Conservative Asp268 Residue in the Peptidoglycan-Associated Domain of the OmpA  
1140 Protein Affects Multiple Acinetobacter baumannii Virulence Characteristics. Molecules 24 (10).  
1141 doi:10.3390/molecules24101972
- 1142 101. Insua JL, Llobet E, Moranta D, Perez-Gutierrez C, Tomas A, Garmendia J, Bengoechea JA (2013)  
1143 Modeling Klebsiella pneumoniae pathogenesis by infection of the wax moth Galleria mellonella.  
1144 Infect Immun 81 (10):3552-3565. doi:10.1128/IAI.00391-13
- 1145 102. Justice SS, Hunstad DA, Cegelski L, Hultgren SJ (2008) Morphological plasticity as a bacterial  
1146 survival strategy. Nat Rev Microbiol 6 (2):162-168. doi:10.1038/nrmicro1820



- 1147 103. Robertson GT, Case ED, Dobbs N, Ingle C, Balaban M, Celli J, Norgard MV (2014)  
1148 FTT0831c/FTL\_0325 contributes to *Francisella tularensis* cell division, maintenance of cell shape,  
1149 and structural integrity. *Infect Immun* 82 (7):2935-2948. doi:10.1128/IAI.00102-14
- 1150 104. Egan AJF (2018) Bacterial outer membrane constriction. *Mol Microbiol* 107 (6):676-687.  
1151 doi:10.1111/mmi.13908
- 1152 105. Kim SW, Choi CH, Moon DC, Jin JS, Lee JH, Shin JH, Kim JM, Lee YC, Seol SY, Cho DT, Lee JC (2009)  
1153 Serum resistance of *Acinetobacter baumannii* through the binding of factor H to outer  
1154 membrane proteins. *FEMS Microbiol Lett* 301 (2):224-231. doi:10.1111/j.1574-  
1155 6968.2009.01820.x
- 1156 106. Choi CH, Lee JS, Lee YC, Park TI, Lee JC (2008) *Acinetobacter baumannii* invades epithelial cells  
1157 and outer membrane protein A mediates interactions with epithelial cells. *BMC Microbiol* 8:216.  
1158 doi:10.1186/1471-2180-8-216
- 1159 107. Kwon HI, Kim S, Oh MH, Na SH, Kim YJ, Jeon YH, Lee JC (2017) Outer membrane protein A  
1160 contributes to antimicrobial resistance of *Acinetobacter baumannii* through the OmpA-like  
1161 domain. *J Antimicrob Chemother* 72 (11):3012-3015. doi:10.1093/jac/dkx257
- 1162 108. Rumbo-Feal S, Perez A, Ramelot TA, Alvarez-Fraga L, Vallejo JA, Beceiro A, Ohneck EJ, Arivett BA,  
1163 Merino M, Fiester SE, Kennedy MA, Actis LA, Bou G, Poza M (2017) Contribution of the A.  
1164 *baumannii* A1S\_0114 Gene to the Interaction with Eukaryotic Cells and Virulence. *Front Cell*  
1165 *Infect Microbiol* 7:108. doi:10.3389/fcimb.2017.00108
- 1166 109. Rumbo-Feal S, Gomez MJ, Gayoso C, Alvarez-Fraga L, Cabral MP, Aransay AM, Rodriguez-  
1167 Ezpeleta N, Fullaondo A, Valle J, Tomas M, Bou G, Poza M (2013) Whole transcriptome analysis  
1168 of *Acinetobacter baumannii* assessed by RNA-sequencing reveals different mRNA expression  
1169 profiles in biofilm compared to planktonic cells. *PLoS One* 8 (8):e72968.  
1170 doi:10.1371/journal.pone.0072968
- 1171 110. Chang KC, Kuo HY, Tang CY, Chang CW, Lu CW, Liu CC, Lin HR, Chen KH, Liou ML (2014)  
1172 Transcriptome profiling in imipenem-selected *Acinetobacter baumannii*. *BMC Genomics* 15:815.  
1173 doi:10.1186/1471-2164-15-815
- 1174 111. Gebhardt MJ, Gallagher LA, Jacobson RK, Usacheva EA, Peterson LR, Zurawski DV, Shuman HA  
1175 (2015) Joint Transcriptional Control of Virulence and Resistance to Antibiotic and Environmental  
1176 Stress in *Acinetobacter baumannii*. *MBio* 6 (6):e01660-01615. doi:10.1128/mBio.01660-15
- 1177 112. Blaschke U, Suwono B, Zafari S, Ebersberger I, Skiebe E, Jeffries CM, Svergun DI, Wilharm G  
1178 (2018) Recombinant production of A1S\_0222 from *Acinetobacter baumannii* ATCC 17978 and  
1179 confirmation of its DNA-(adenine N6)-methyltransferase activity. *Protein Expr Purif* 151:78-85.  
1180 doi:10.1016/j.pep.2018.06.009

- 1181 113. Roberts RJ, Vincze T, Posfai J, Macelis D (2015) REBASE-a database for DNA restriction and  
1182 modification: enzymes, genes and genomes. *Nucleic Acids Research* 43 (D1):D298-D299.  
1183 doi:10.1093/nar/gku1046
- 1184 114. Wion D, Casadesus J (2006) N6-methyl-adenine: an epigenetic signal for DNA-protein  
1185 interactions. *Nat Rev Microbiol* 4 (3):183-192. doi:10.1038/nrmicro1350
- 1186 115. Adhikari S, Curtis PD (2016) DNA methyltransferases and epigenetic regulation in bacteria. *FEMS*  
1187 *Microbiol Rev* 40 (5):575-591. doi:10.1093/femsre/fuw023
- 1188 116. Marinus MG, Morris NR (1973) Isolation of deoxyribonucleic acid methylase mutants of  
1189 *Escherichia coli* K-12. *J Bacteriol* 114 (3):1143-1150
- 1190 117. Collier J (2009) Epigenetic regulation of the bacterial cell cycle. *Curr Opin Microbiol* 12 (6):722-  
1191 729. doi:10.1016/j.mib.2009.08.005
- 1192 118. Salzer R, Kern T, Joos F, Averhoff B (2016) The *Thermus thermophilus* comEA/comEC operon is  
1193 associated with DNA binding and regulation of the DNA translocator and type IV pili. *Environ*  
1194 *Microbiol* 18 (1):65-74. doi:10.1111/1462-2920.12820
- 1195 119. Rabinovich L, Sigal N, Borovok I, Nir-Paz R, Herskovits AA (2012) Prophage excision activates  
1196 *Listeria* competence genes that promote phagosomal escape and virulence. *Cell* 150 (4):792-  
1197 802. doi:10.1016/j.cell.2012.06.036
- 1198 120. Yoshida A, Kuramitsu HK (2002) Multiple *Streptococcus mutans* Genes Are Involved in Biofilm  
1199 Formation. *Appl Environ Microbiol* 68 (12):6283-6291. doi:10.1128/aem.68.12.6283-6291.2002
- 1200 121. Lees-Miller RG, Iwashkiw JA, Scott NE, Seper A, Vinogradov E, Schild S, Feldman MF (2013) A  
1201 common pathway for O-linked protein-glycosylation and synthesis of capsule in *Acinetobacter*  
1202 *baumannii*. *Mol Microbiol* 89 (5):816-830. doi:10.1111/mmi.12300
- 1203 122. Russo TA, Luke NR, Beanan JM, Olson R, Sauberan SL, MacDonald U, Schultz LW, Umland TC,  
1204 Campagnari AA (2010) The K1 capsular polysaccharide of *Acinetobacter baumannii* strain 307-  
1205 0294 is a major virulence factor. *Infect Immun* 78 (9):3993-4000. doi:10.1128/IAI.00366-10
- 1206 123. Schaper S, Wendt H, Bamberger J, Sieber V, Schmid J, Becker A (2019) A Bifunctional UDP-Sugar  
1207 4-Epimerase Supports Biosynthesis of Multiple Cell Surface Polysaccharides in *Sinorhizobium*  
1208 *meliloti*. *J Bacteriol* 201 (10). doi:10.1128/JB.00801-18
- 1209 124. Nesper J, Lauriano CM, Klose KE, Kapfhammer D, Kraiss A, Reidl J (2001) Characterization of  
1210 *Vibrio cholerae* O1 El tor galU and galE mutants: influence on lipopolysaccharide structure,  
1211 colonization, and biofilm formation. *Infect Immun* 69 (1):435-445. doi:10.1128/IAI.69.1.435-  
1212 445.2001

- 1213 125. Chai Y, Beauregard PB, Vlamakis H, Losick R, Kolter R (2012) Galactose metabolism plays a  
1214 crucial role in biofilm formation by *Bacillus subtilis*. *MBio* 3 (4):e00184-00112.  
1215 doi:10.1128/mBio.00184-12
- 1216 126. Niou YK, Wu WL, Lin LC, Yu MS, Shu HY, Yang HH, Lin GH (2009) Role of galE on biofilm  
1217 formation by *Thermus* spp. *Biochem Biophys Res Commun* 390 (2):313-318.  
1218 doi:10.1016/j.bbrc.2009.09.120
- 1219 127. Zou Y, Feng S, Xu C, Zhang B, Zhou S, Zhang L, He X, Li J, Yang Z, Liao M (2013) The role of galU  
1220 and galE of *Haemophilus parasuis* SC096 in serum resistance and biofilm formation. *Vet*  
1221 *Microbiol* 162 (1):278-284. doi:10.1016/j.vetmic.2012.08.006
- 1222 128. Nakao R, Senpuku H, Watanabe H (2006) *Porphyromonas gingivalis* galE is involved in  
1223 lipopolysaccharide O-antigen synthesis and biofilm formation. *Infect Immun* 74 (11):6145-6153.  
1224 doi:10.1128/IAI.00261-06
- 1225 129. Cabral MP, Soares NC, Aranda J, Parreira JR, Rumbo C, Poza M, Valle J, Calamia V, Lasa I, Bou G  
1226 (2011) Proteomic and functional analyses reveal a unique lifestyle for *Acinetobacter baumannii*  
1227 biofilms and a key role for histidine metabolism. *J Proteome Res* 10 (8):3399-3417.  
1228 doi:10.1021/pr101299j
- 1229 130. Chateau A, Lunderberg JM, Oh SY, Abshire T, Friedlander A, Quinn CP, Missiakas DM,  
1230 Schneewind O (2018) Galactosylation of the Secondary Cell Wall Polysaccharide of *Bacillus*  
1231 *anthracis* and Its Contribution to Anthrax Pathogenesis. *J Bacteriol* 200 (5).  
1232 doi:10.1128/JB.00562-17
- 1233 131. Zeng Y, He Y, Wang KY, Wang J, Zeng YK, Chen YX, Chen D, Geng Y, OuYang P (2016) cpsJ gene of  
1234 *Streptococcus iniae* is involved in capsular polysaccharide synthesis and virulence. *Antonie Van*  
1235 *Leeuwenhoek* 109 (11):1483-1492. doi:10.1007/s10482-016-0750-1
- 1236 132. Remy E, Meyer M, Blaise F, Simon UK, Kuhn D, Balesdent MH, Rouxel T (2009) A key enzyme of  
1237 the Leloir pathway is involved in pathogenicity of *Leptosphaeria maculans* toward oilseed rape.  
1238 *Mol Plant Microbe Interact* 22 (6):725-736. doi:10.1094/MPMI-22-6-0725
- 1239 133. Anton DN (1995) Resistance to mecillinam produced by the co-operative action of mutations  
1240 affecting lipopolysaccharide, spoT, and cya or crp genes of *Salmonella typhimurium*. *Mol*  
1241 *Microbiol* 16 (3):587-595. doi:10.1111/j.1365-2958.1995.tb02421.x
- 1242 134. Hickman FW, Rhoden DL, Esaias AO, Baron LS, Brenner DJ, Farmer JJ, 3rd (1982) Evaluation of  
1243 two *Salmonella typhi* strains with reduced virulence for use in teaching and proficiency testing. *J*  
1244 *Clin Microbiol* 15 (6):1085-1091

- 1245 135. Carlson-Banning KM, Chou A, Liu Z, Hamill RJ, Song Y, Zechiedrich L (2013) Toward repurposing  
1246 ciclopirox as an antibiotic against drug-resistant *Acinetobacter baumannii*, *Escherichia coli*, and  
1247 *Klebsiella pneumoniae*. *PLoS One* 8 (7):e69646. doi:10.1371/journal.pone.0069646
- 1248 136. Dey S, Lane JM, Lee RE, Rubin EJ, Sacchettini JC (2010) Structural characterization of the  
1249 *Mycobacterium tuberculosis* biotin biosynthesis enzymes 7,8-diaminopelargonic acid synthase  
1250 and dethiobiotin synthetase. *Biochemistry* 49 (31):6746-6760. doi:10.1021/bi902097j
- 1251 137. Salaemae W, Azhar A, Booker GW, Polyak SW (2011) Biotin biosynthesis in *Mycobacterium*  
1252 *tuberculosis*: physiology, biochemistry and molecular intervention. *Protein Cell* 2 (9):691-695.  
1253 doi:10.1007/s13238-011-1100-8
- 1254 138. Said HM (2009) Cell and molecular aspects of human intestinal biotin absorption. *J Nutr* 139  
1255 (1):158-162. doi:10.3945/jn.108.092023
- 1256 139. Woong Park S, Klotzsche M, Wilson DJ, Boshoff HI, Eoh H, Manjunatha U, Blumenthal A, Rhee K,  
1257 Barry CE, 3rd, Aldrich CC, Ehrt S, Schnappinger D (2011) Evaluating the sensitivity of  
1258 *Mycobacterium tuberculosis* to biotin deprivation using regulated gene expression. *PLoS Pathog*  
1259 7 (9):e1002264. doi:10.1371/journal.ppat.1002264
- 1260 140. Mu X, Wang N, Li X, Shi K, Zhou Z, Yu Y, Hua X (2016) The Effect of Colistin Resistance-Associated  
1261 Mutations on the Fitness of *Acinetobacter baumannii*. *Front Microbiol* 7:1715.  
1262 doi:10.3389/fmicb.2016.01715
- 1263 141. Shirai H, Mizuguchi K (2003) Prediction of the structure and function of AstA and AstB, the first  
1264 two enzymes of the arginine succinyltransferase pathway of arginine catabolism. *FEBS Lett* 555  
1265 (3):505-510. doi:10.1016/s0014-5793(03)01314-0
- 1266 142. Peleg AY, Jara S, Monga D, Eliopoulos GM, Moellering RC, Jr., Mylonakis E (2009) *Galleria*  
1267 *mellonella* as a model system to study *Acinetobacter baumannii* pathogenesis and therapeutics.  
1268 *Antimicrob Agents Chemother* 53 (6):2605-2609. doi:10.1128/AAC.01533-08
- 1269 143. Jacobs AC, Thompson MG, Black CC, Kessler JL, Clark LP, McQueary CN, Gancz HY, Corey BW,  
1270 Moon JK, Si Y, Owen MT, Hallock JD, Kwak YI, Summers A, Li CZ, Rasko DA, Penwell WF, Honnold  
1271 CL, Wise MC, Waterman PE, Lesho EP, Stewart RL, Actis LA, Palys TJ, Craft DW, Zurawski DV  
1272 (2014) AB5075, a Highly Virulent Isolate of *Acinetobacter baumannii*, as a Model Strain for the  
1273 Evaluation of Pathogenesis and Antimicrobial Treatments. *MBio* 5 (3):e01076-01014.  
1274 doi:10.1128/mBio.01076-14
- 1275 144. Harms K, Lunnan A, Hulter N, Mourier T, Vinner L, Andam CP, Marttinen P, Fridholm H, Hansen  
1276 AJ, Hanage WP, Nielsen KM, Willerslev E, Johnsen PJ (2016) Substitutions of short heterologous  
1277 DNA segments of intragenomic or extragenomic origins produce clustered genomic  
1278 polymorphisms. *Proc Natl Acad Sci U S A* 113 (52):15066-15071. doi:10.1073/pnas.1615819114

- 1279 145. Domingues S, Harms K, Fricke WF, Johnsen PJ, da Silva GJ, Nielsen KM (2012) Natural  
1280 transformation facilitates transfer of transposons, integrons and gene cassettes between  
1281 bacterial species. PLoS Pathog 8 (8):e1002837. doi:10.1371/journal.ppat.1002837  
1282

1 **Table 1. Summary of experimental results on genes involved in surface-associated motility in *A. baumannii* ATCC 17978**

| Locus tag in ATCC 17978 | Annotation/gene name | Predicted function | Motility deficiency <sup>[a]</sup> | Growth deficiency <sup>[b]</sup> | Attenuation in <i>Galleria mellonella</i> infection <sup>[c]</sup> | Pellicle biofilm formation <sup>[d]</sup> | MIC values <sup>[e]</sup> |          |              |
|-------------------------|----------------------|--------------------|------------------------------------|----------------------------------|--------------------------------------------------------------------|-------------------------------------------|---------------------------|----------|--------------|
|                         |                      |                    |                                    |                                  |                                                                    |                                           | Ampicillin                | Imipenem | Tetracycline |

*Purine/pyrimidine/folate biosynthesis*

|          |             |                                                                              |     |   |      |      |       |      |      |
|----------|-------------|------------------------------------------------------------------------------|-----|---|------|------|-------|------|------|
| A1S_2187 | <i>purH</i> | phosphoribosylaminoimidazolecarboxamide formyltransferase (purine synthesis) | +   | Y | N.s. | ↑**  | N.s.  | N.s. | N.s. |
| A1S_2251 | <i>purF</i> | amidophosphoribosyltransferase (purine synthesis)                            | ++  | Y | N.s. | N.s. | R *** | N.s. | R *  |
| A1S_2605 | <i>purM</i> | phosphoribosylaminoimidazole synthetase (purine synthesis)                   | +++ | Y | *    | ↑*   | R *** | N.s. | S *  |
| A1S_2964 | <i>purE</i> | phosphoribosylaminoimidazole                                                 | +++ | Y | N.s. | ↑*** | R *** | S ** | S *  |

|                 |             |                                                                                                             |     |   |      |       |        |       |      |
|-----------------|-------------|-------------------------------------------------------------------------------------------------------------|-----|---|------|-------|--------|-------|------|
| <b>A1S_1566</b> |             | carboxylase mutase subunit (purine synthesis)<br>6-pyruvoyl-tetrahydropterin synthase (folate biosynthesis) | +++ | Y | **   | ↓**** | R **** | N.s.  | N.s. |
| <b>A1S_2687</b> | <i>carB</i> | carbamoylphosphate synthase subunit (pyrimidine synthesis)                                                  | ++  | Y | **** | ↓**** | N.s.   | S *** | S ** |

*Alarmones/ stress metabolism*

|                 |  |                      |    |   |      |       |        |       |      |
|-----------------|--|----------------------|----|---|------|-------|--------|-------|------|
| <b>A1S_0414</b> |  | Ap5A pyrophosphatase | ++ | Y | *    | ↓**** | R **** | N.s.  | N.s. |
| <b>A1S_1624</b> |  | Ap4A hydrolase       | ++ | Y | N.s. | N.s.  | N.s.   | S *** | N.s. |

*RNA modification/ regulation*

|                 |             |                                                           |     |   |      |       |      |      |       |
|-----------------|-------------|-----------------------------------------------------------|-----|---|------|-------|------|------|-------|
| <b>A1S_0447</b> | <i>rpmG</i> | 50S ribosomal protein L33                                 | +++ | Y | N.s. | N.s.  | N.s. | S *  | S **  |
| <b>A1S_0778</b> | <i>metG</i> | methionyl-tRNA synthetase                                 | +++ | Y | **** | ↓**** | N.s. | N.s. | S *** |
| <b>A1S_2182</b> | <i>gidA</i> | Glucose-inhibited division protein A, FAD-binding protein | ++  | Y | N.s. | ↓**** | R *  | N.s. | N.s.  |

*Oxidative stress*

|                 |             |                                                        |    |   |      |       |       |      |      |
|-----------------|-------------|--------------------------------------------------------|----|---|------|-------|-------|------|------|
| <b>A1S_0530</b> |             | rhodanese domain-containing protein, sulfurtransferase | ++ | N | N.s. | ↑**** | N.s.  | N.s. | N.s. |
| <b>A1S_3366</b> | <i>gshA</i> | gamma-glutamate-cysteine ligase                        | ++ | Y | *    | N.s.  | R *** | N.s. | N.s. |

*Outer membrane proteins*

|                 |             |                                       |    |   |      |       |        |       |      |
|-----------------|-------------|---------------------------------------|----|---|------|-------|--------|-------|------|
| <b>A1S_1970</b> |             | outer membrane protein (Omp85 family) | ++ | Y | **   | ↓**   | R **** | S *   | N.s. |
| <b>A1S_2840</b> | <i>ompA</i> | outer membrane protein                | ++ | N | **** | ↓**** | N.s.   | R *** | S *  |
| <b>A1S_3297</b> |             | putative outer membrane protein       | +  | Y | **   | ↑**   | R ***  | R *   | N.s. |

*1,3-diaminopropane biosynthesis*

|                 |            |                                                                               |     |   |      |       |      |      |       |
|-----------------|------------|-------------------------------------------------------------------------------|-----|---|------|-------|------|------|-------|
| <b>A1S_2453</b> | <i>ddc</i> | L-2,4-diaminobutyrate decarboxylase, biosynthesis of 1,3-diaminopropane (DAP) | +++ | Y | N.s. | ↓**** | N.s. | N.s. | S *** |
| <b>A1S_2454</b> | <i>dat</i> | L-2,4-diaminobutyrate:2-                                                      | +++ | Y | *    | ↓**** | N.s. | N.s. | S *** |



|  |  |                                                                                  |  |  |  |  |  |  |  |
|--|--|----------------------------------------------------------------------------------|--|--|--|--|--|--|--|
|  |  | ketoglutarate 4-aminotransferase,<br>biosynthesis of 1,3-diaminopropane<br>(DAP) |  |  |  |  |  |  |  |
|--|--|----------------------------------------------------------------------------------|--|--|--|--|--|--|--|

*Lipopeptide synthesis/export*

|                 |  |                                                               |    |   |      |     |       |      |      |
|-----------------|--|---------------------------------------------------------------|----|---|------|-----|-------|------|------|
| <b>A1S_0113</b> |  | acyl-CoA dehydrogenase (putative<br>lipoprotein biosynthesis) | ++ | N | N.s. | ↓** | R *   | N.s. | N.s. |
| <b>A1S_0116</b> |  | RND superfamily transporter (Efflux<br>pump)                  | ++ | N | N.s. | ↓** | R *** | N.s. | N.s. |

*DNA modification/repair/uptake*

|                 |              |                                        |     |   |      |       |       |       |      |
|-----------------|--------------|----------------------------------------|-----|---|------|-------|-------|-------|------|
| <b>A1S_0222</b> | <i>aamA</i>  | adenine-specific methyltransferase     | ++  | Y | ***  | ↓**** | N.s.  | S *** | S ** |
| <b>A1S_2334</b> | <i>sahH</i>  | S-adenosyl-L-homocysteine<br>hydrolase | +++ | Y | *    | N.s.  | R *** | N.s.  | N.s. |
| <b>A1S_2587</b> | <i>ruvA</i>  | holliday junction helicase subunit A   | ++  | Y | N.s. | ↓**** | R *** | N.s.  | S ** |
| <b>A1S_2610</b> | <i>comEC</i> | competence factor                      | ++  | N | **   | N.s.  | N.s.  | N.s.  | N.s. |

Others

|                 |             |                                                               |     |   |      |       |        |        |      |
|-----------------|-------------|---------------------------------------------------------------|-----|---|------|-------|--------|--------|------|
| <b>A1S_0065</b> | <i>galE</i> | UDP-glucose 4-epimerase,<br>Lipopolysaccharide biosynthesis   | ++  | N | **** | ↑**** | R ***  | N.s.   | R *  |
| <b>A1S_0806</b> |             | adenosylmethionine-8-amino-7-oxononanoate aminotransferase    | +++ | Y | N.s. | ↑**** | R ***  | R **** | N.s. |
| <b>A1S_1055</b> |             | soluble lytic murein transglycosylase                         | ++  | N | **   | ↑**   | N.s.   | N.s.   | S *  |
| <b>A1S_2761</b> | <i>prpF</i> | 2-methylaconitate isomerase                                   | +++ | Y | N.s. | ↓**** | R *    | N.s.   | S ** |
| <b>A1S_3026</b> |             | Hyp. Secreted Ribonuclease T2<br>(predicted secretion signal) | ++  | N | N.s. | N.s.  | R **** | R ***  | N.s. |
| <b>A1S_3129</b> | <i>astB</i> | succinylarginine dihydrolase                                  | +++ | Y | N.s. | ↓**** | R ***  | N.s.   | S ** |

4 <sup>[a]</sup> Compared to ATCC 17978 wild type strain (WT); diameter of the spreading zone was measured: '+++', 0-4 mm; '++', < 4-9 mm; '+', < 9 mm

5 <sup>[b]</sup> Comparison of bacterial growth curves. Y, growth deficiency compared to WT was observed; N, no growth deficiency was observed

6 <sup>[c]</sup> Compared to ATCC 17978 WT; unpaired t-test was performed after 5 days p.i.: N.s., not significant; \*, p-value ≤ 0.05; \*\*, p-value ≤ 0.01; \*\*\*, p-value ≤ 0.001;

7 \*\*\*\*, p-value ≤ 0.0001

8 <sup>[d]</sup> Compared to ATCC 17978 WT; unpaired t-test was performed: N.s., not significant; \*, p-value ≤ 0.05; \*\*, p-value ≤ 0.01; \*\*\*, p-value ≤ 0.001; \*\*\*\*, p-value ≤  
9 0.0001; ↑, more than ATCC 17978 WT; ↓, less than ATCC 17978 WT

10 <sup>[e]</sup> Compared to ATCC 17978 WT; unpaired t-test was performed: N.s., not significant; \*, p-value ≤ 0.05; \*\*, p-value ≤ 0.01; \*\*\*, p-value ≤ 0.001; \*\*\*\*, p-value ≤  
11 0.0001; R, resistant; S, susceptible

**Table 2. Summary of experimental results on genes involved in surface-associated motility in *A. baumannii* 29D2.** A dark grey background indicates concordance to results obtained for strain ATCC 17978

| Locus tag in ATCC 17978 | Annotation/gene name | Motility deficiency <sup>[a]</sup> | Growth deficiency <sup>[b]</sup> | Attenuation in <i>Galleria mellonella</i> infection <sup>[c]</sup> | Pellicle biofilm formation <sup>[d]</sup> | MIC values <sup>[e]</sup> |          |              |
|-------------------------|----------------------|------------------------------------|----------------------------------|--------------------------------------------------------------------|-------------------------------------------|---------------------------|----------|--------------|
|                         |                      |                                    |                                  |                                                                    |                                           | Ampicillin                | Imipenem | Tetracycline |

*Purine/pyrimidine/folate biosynthesis*

|          |             |    |   |      |      |      |      |      |
|----------|-------------|----|---|------|------|------|------|------|
| A1S_2187 | <i>purH</i> | ++ | Y | *    | ↑*   | S *  | N.s. | N.s. |
| A1S_2251 | <i>purF</i> | ++ | Y | N.s. | N.s. | S ** | S *  | N.s. |
| A1S_2605 | <i>purM</i> | +  | Y | N.s. | N.s. | S *  | N.s. | N.s. |
| A1S_2964 | <i>purE</i> | +  | Y | N.s. | N.s. | S ** | N.s. | N.s. |
| A1S_1566 |             | +  | Y | ***  | N.s. | S *  | N.s. | S *  |
| A1S_2687 | <i>carB</i> | +  | Y | **** | ↓**  | S ** | S ** | N.s. |

*Alarmones/stress metabolism*

|                 |  |   |   |      |      |      |      |      |
|-----------------|--|---|---|------|------|------|------|------|
| <b>A1S_0414</b> |  | + | N | N.s. | N.s. | N.s. | N.s. | N.s. |
|-----------------|--|---|---|------|------|------|------|------|

*RNA modification/ regulation*

|                 |             |   |   |      |    |     |      |      |
|-----------------|-------------|---|---|------|----|-----|------|------|
| <b>A1S_2182</b> | <i>gidA</i> | + | N | N.s. | ↓* | S * | N.s. | N.s. |
|-----------------|-------------|---|---|------|----|-----|------|------|

*Oxidative stress*

|                 |             |   |   |      |      |     |      |      |
|-----------------|-------------|---|---|------|------|-----|------|------|
| <b>A1S_3366</b> | <i>gshA</i> | + | Y | N.s. | N.s. | S * | N.s. | N.s. |
|-----------------|-------------|---|---|------|------|-----|------|------|

*Outer membrane proteins*

|                 |             |   |   |      |      |      |      |      |
|-----------------|-------------|---|---|------|------|------|------|------|
| <b>A1S_1970</b> |             | + | N | N.s. | ↓**  | N.s. | N.s. | N.s. |
| <b>A1S_2840</b> | <i>ompA</i> | + | Y | **** | N.s. | S *  | S ** | N.s. |

*1,3-diaminopropane biosynthesis*

|                 |            |    |   |      |     |      |      |      |
|-----------------|------------|----|---|------|-----|------|------|------|
| <b>A1S_2453</b> | <i>ddc</i> | ++ | Y | *    | ↓** | S ** | S *  | N.s. |
| <b>A1S_2454</b> | <i>dat</i> | +  | Y | N.s. | ↓*  | S ** | N.s. | R *  |

*Lipopeptide synthesis/export*

|                 |  |   |   |      |      |      |      |      |
|-----------------|--|---|---|------|------|------|------|------|
| <b>A1S_0116</b> |  | + | N | N.s. | N.s. | N.s. | N.s. | N.s. |
|-----------------|--|---|---|------|------|------|------|------|

*DNA modification/repair/uptake*

|                 |              |   |   |      |      |      |      |      |
|-----------------|--------------|---|---|------|------|------|------|------|
| <b>A1S_0222</b> | <i>aamA</i>  | + | N | *    | N.s. | N.s. | R ** | N.s. |
| <b>A1S_2610</b> | <i>comEC</i> | + | Y | **** | N.s. | S ** | S ** | S *  |

*Others*

|                 |             |    |   |      |      |      |        |      |
|-----------------|-------------|----|---|------|------|------|--------|------|
| <b>A1S_0065</b> | <i>galE</i> | ++ | Y | **** | ↑*   | S *  | N.s.   | N.s. |
| <b>A1S_0806</b> |             | +  | N | N.s. | N.s. | S *  | S **** | N.s. |
| <b>A1S_1055</b> |             | +  | N | **   | N.s. | N.s. | S *    | N.s. |
| <b>A1S_2761</b> | <i>prpF</i> | +  | Y | **   | N.s. | S *  | S *    | S *  |
| <b>A1S_3026</b> |             | +  | N | **   | ↓*   | R *  | R ***  | N.s. |

<sup>[a]</sup> Compared to 29D2 wild type strain (WT); diameter of the spreading zone was measured: '+++', 0-3 mm; '++', < 3-6 mm; '+', < 6 mm

<sup>[b]</sup> Comparison of bacterial growth curves. Y, growth deficiency compared to WT was observed; N, no growth deficiency was observed

<sup>[c]</sup> Compared to 29D2 WT; unpaired t-test was performed after 5 days p.i.: n.s., not significant; \*, p-value  $\leq$  0.05; \*\*, p-value  $\leq$  0.01; \*\*\*, p-value  $\leq$  0.001; \*\*\*\*, p-value  $\leq$  0.0001

<sup>[d]</sup> Compared to 29D2 WT; unpaired t-test was performed: n.s., not significant; \*, p-value  $\leq$  0.05; \*\*, p-value  $\leq$  0.01; \*\*\*, p-value  $\leq$  0.001; \*\*\*\*, p-value  $\leq$  0.0001;  $\uparrow$ , more than 29D2 WT;  $\downarrow$ , less than 29D2 WT

<sup>[e]</sup> Compared to 29D2 WT; unpaired t-test was performed: N.s., not significant; \*, p-value  $\leq$  0.05; \*\*, p-value  $\leq$  0.01; \*\*\*, p-value  $\leq$  0.001; \*\*\*\*, p-value  $\leq$  0.0001; R, resistant; S, susceptible

1 **Table 3. Minimal inhibitory concentration (MIC) of ampicillin, tetracycline and**  
 2 **imipenem determined from ATCC 17978 wildtype/mutants and 29D2**  
 3 **wildtype/mutants.** A dark grey background indicates that MIC values of mutant  
 4 strains are significantly elevated compared to the wildtype while a light grey  
 5 background indicates increased susceptibility

| Locus tag       | Gene name   | Ampicillin <sup>a</sup> |             | Imipenem <sup>a</sup> |             | Tetracycline <sup>a</sup> |            |
|-----------------|-------------|-------------------------|-------------|-----------------------|-------------|---------------------------|------------|
|                 |             | ATCC 17978              | 29D2        | ATCC 17978            | 29D2        | ATCC 17978                | 29D2       |
| <b>Wildtype</b> |             | 25.3                    | 36.5        | 0.23                  | 0.25        | 2.1                       | 3.25       |
| <b>A1S_2187</b> | <i>purH</i> | 32                      | <b>18.6</b> | 0.23                  | 0.21        | 1.6                       | 1.5        |
| <b>A1S_2251</b> | <i>purF</i> | <b>48</b>               | <b>16.0</b> | 0.25                  | <b>0.16</b> | <b>3.0</b>                | 2.3        |
| <b>A1S_2605</b> | <i>purM</i> | <b>53.3</b>             | <b>17.3</b> | 0.21                  | 0.18        | <b>1.0</b>                | 2.3        |
| <b>A1S_2964</b> | <i>purE</i> | <b>53.3</b>             | <b>10.6</b> | <b>0.13</b>           | 0.21        | <b>1.5</b>                | 2.0        |
| <b>A1S_1566</b> |             | <b>96</b>               | <b>18.6</b> | 0.23                  | 0.23        | 1.8                       | <b>0.9</b> |
| <b>A1S_2687</b> | <i>carB</i> | 32                      | <b>3.0</b>  | <b>0.10</b>           | <b>0.03</b> | <b>0.9</b>                | 2.0        |
| <b>A1S_0414</b> |             | <b>106.6</b>            | 32.0        | 0.23                  | 0.25        | 1.6                       | 2.0        |
| <b>A1S_1624</b> |             | 32                      | -           | <b>0.125</b>          | -           | 2.1                       | -          |
| <b>A1S_0447</b> | <i>rpmG</i> | 29.3                    | -           | <b>0.16</b>           | -           | <b>1.0</b>                | -          |
| <b>A1S_0778</b> | <i>metG</i> | 32                      | -           | 0.23                  | -           | <b>0.46</b>               | -          |
| <b>A1S_0530</b> |             | 24                      | -           | 0.19                  | -           | 2.0                       | -          |
| <b>A1S_3366</b> | <i>gshA</i> | <b>85.3</b>             | <b>26.6</b> | 0.29                  | 0.23        | 1.6                       | 2.0        |
| <b>A1S_1970</b> |             | <b>64</b>               | 32.0        | <b>0.16</b>           | 0.25        | 2.5                       | 1.8        |



|                 |              |              |             |              |              |             |            |
|-----------------|--------------|--------------|-------------|--------------|--------------|-------------|------------|
| <b>A1S_2840</b> | <i>ompA</i>  | 29.3         | <b>13.3</b> | <b>0.46</b>  | <b>0.13</b>  | <b>1.5</b>  | 3.0        |
| <b>A1S_3297</b> |              | <b>58.6</b>  | -           | <b>0.33</b>  | -            | 2.0         | -          |
| <b>A1S_2453</b> | <i>ddc</i>   | 32           | <b>5.0</b>  | 0.46         | <b>0.14</b>  | <b>0.38</b> | 4.6        |
| <b>A1S_2454</b> | <i>dat</i>   | 26.6         | <b>5.3</b>  | 0.25         | 0.23         | <b>0.29</b> | <b>6.0</b> |
| <b>A1S_0113</b> |              | <b>42.6</b>  | -           | 0.25         | -            | 2.0         | -          |
| <b>A1S_0116</b> |              | <b>85.3</b>  | 29.3        | 0.21         | 0.33         | 2.6         | 1.5        |
| <b>A1S_0222</b> | <i>aamA</i>  | 18.6         | 42.6        | <b>0.125</b> | <b>0.38</b>  | <b>0.9</b>  | 2.6        |
| <b>A1S_0065</b> | <i>galE</i>  | <b>53.3</b>  | <b>13.3</b> | 0.23         | 0.18         | <b>3.0</b>  | 2.0        |
| <b>A1S_0806</b> |              | <b>53.3</b>  | <b>13.3</b> | <b>0.38</b>  | <b>0.023</b> | 2.0         | 1.6        |
| <b>A1S_1055</b> |              | 26.6         | 21.3        | 0.29         | <b>0.14</b>  | <b>1.3</b>  | 1.6        |
| <b>A1S_2182</b> | <i>gidA</i>  | <b>37.3</b>  | <b>24.0</b> | 0.19         | 0.25         | 3.0         | 4.0        |
| <b>A1S_2334</b> | <i>sahH</i>  | <b>74.6</b>  | -           | 0.18         | -            | 1.8         | -          |
| <b>A1S_2587</b> | <i>ruvA</i>  | <b>53.3</b>  | -           | 0.19         | -            | <b>1.0</b>  | -          |
| <b>A1S_2610</b> | <i>comEC</i> | 29.3         | <b>5.3</b>  | 0.23         | <b>0.10</b>  | 1.6         | <b>0.6</b> |
| <b>A1S_2761</b> | <i>prpF</i>  | <b>42.6</b>  | <b>14.6</b> | 0.25         | <b>0.16</b>  | <b>0.8</b>  | <b>0.5</b> |
| <b>A1S_3026</b> |              | <b>106.6</b> | <b>64.0</b> | <b>0.42</b>  | <b>0.46</b>  | 2.6         | 1.5        |
| <b>A1S_3129</b> | <i>astB</i>  | <b>74.6</b>  | -           | 0.23         | -            | <b>1.1</b>  | -          |

6 <sup>a</sup> Averaged MIC values in [ $\mu\text{g/mL}$ ] determined from three independent experiments. '-' indicates 'not  
7 tested'

9 **Table 4. Links between the genes identified in this study and the literature**

| Locus tag in ATCC 17978                      | Annotation/<br>gene name | Known relationship in other bacteria                                                                                                                                                                                                                                                                                                                             |
|----------------------------------------------|--------------------------|------------------------------------------------------------------------------------------------------------------------------------------------------------------------------------------------------------------------------------------------------------------------------------------------------------------------------------------------------------------|
| <i>Purine/pyrimidine/folate biosynthesis</i> |                          |                                                                                                                                                                                                                                                                                                                                                                  |
| A1S_2187                                     | <i>purH</i>              | biofilm formation in <i>Bacillus cereus</i> [48]; virulence in <i>B. anthracis</i> [54]; K <sup>+</sup> -dependent colony spreading in <i>Bacillus subtilis</i> [45]; <i>Enterococcus faecium</i> growth in human serum [49]; defects in rifampicin persistence in <i>S. aureus</i> [56]                                                                         |
| A1S_2251                                     | <i>purF</i>              | virulence in <i>A. baumannii</i> [52]; K <sup>+</sup> -dependent colony spreading in <i>Bacillus subtilis</i> [45]; virulence in <i>Pasteurella multocida</i> [55]; virulence of <i>Burkholderia cenocepacia</i> in <i>G. mellonella</i> , <i>C. elegans</i> , <i>D. melanogaster</i> infection [51]; defects in rifampicin persistence in <i>S. aureus</i> [56] |
| A1S_2605                                     | <i>purM</i>              | virulence in <i>A. baumannii</i> [52]; K <sup>+</sup> -dependent colony spreading in <i>Bacillus subtilis</i> [45]; defects in rifampicin persistence in <i>S. aureus</i> [56]; pellicles in <i>A. baumannii</i> ATCC 17978 [43]                                                                                                                                 |
| A1S_2964                                     | <i>purE</i>              | virulence in <i>S. pneumoniae</i> [53] and <i>A. baumannii</i> [52]; motility ( <i>purK</i> ) in <i>A. nosocomialis</i> [26]; pellicles in <i>A. baumannii</i> ATCC 17978 ( <i>PurB</i> , <i>PurD</i> ) [43]                                                                                                                                                     |
| A1S_1566                                     |                          | -                                                                                                                                                                                                                                                                                                                                                                |
| A1S_2687                                     | <i>carB</i>              | swimming motility and biofilm formation in <i>Xanthomonas citri subsp. citri</i> [61]; virulence in <i>A. baumannii</i> [52]; growth of <i>E. coli</i> in human serum [50]                                                                                                                                                                                       |

*Alarmons/ stress metabolite*

|                 |  |                                                                                                                                                                                                                                                                                                                       |
|-----------------|--|-----------------------------------------------------------------------------------------------------------------------------------------------------------------------------------------------------------------------------------------------------------------------------------------------------------------------|
| <b>A1S_0414</b> |  | -                                                                                                                                                                                                                                                                                                                     |
| <b>A1S_1624</b> |  | motility in <i>E. coli</i> [66]; pellicles in <i>A. baumannii</i> ATCC 17978 [43]; biofilm formation in <i>Pseudomonas fluorescens</i> [70]; virulence in <i>Salmonella enterica</i> [67]; antibiotic susceptibility in <i>E. coli</i> , <i>A. baumannii</i> and <i>P. aeruginosa</i> [68]; antibiotic tolerance [69] |

*RNA modification/regulation*

|                 |             |                                                                                                                                                                                                                                                                                                                                                                                                                                |
|-----------------|-------------|--------------------------------------------------------------------------------------------------------------------------------------------------------------------------------------------------------------------------------------------------------------------------------------------------------------------------------------------------------------------------------------------------------------------------------|
| <b>A1S_0447</b> | <i>rpmG</i> | mitomycin C resistance in <i>E. coli</i> [82]                                                                                                                                                                                                                                                                                                                                                                                  |
| <b>A1S_0778</b> | <i>metG</i> | virulence in <i>A. baumannii</i> [52]; antibiotic tolerance in <i>Burkholderia thailandensis</i> [79] and <i>E. coli</i> [80,81]; pellicles in <i>A. baumannii</i> ATCC 17978 [43]                                                                                                                                                                                                                                             |
| <b>A1S_2182</b> | <i>gidA</i> | review <i>gid</i> operon, virulence, motility, biofilm formation, antibiotic resistance, bacterial growth [75]; swarming motility, pellicle biofilm in <i>Bacillus cereus</i> [47]; swarming motility in <i>Serratia</i> species SCBI [73] and <i>Pseudomonas syringae</i> [74]; proteomic analysis in <i>A. baumannii</i> [76]; biofilm formation in <i>Pseudomonas fluorescens</i> [77] and <i>Streptococcus mutans</i> [78] |

*Oxidative stress*

|                 |             |                                                                                                                                                                                                                     |
|-----------------|-------------|---------------------------------------------------------------------------------------------------------------------------------------------------------------------------------------------------------------------|
| <b>A1S_0530</b> |             | virulence in <i>Salmonella Typhimurium</i> [144]; thioredoxin involved in <i>A. baumannii</i> virulence [145]; general oxidative stress response genes involved in pellicles in <i>A. baumannii</i> ATCC 17978 [43] |
| <b>A1S_3366</b> | <i>gshA</i> | swarming and swimming motility in <i>P. aeruginosa</i> , decrease in biofilm formation [85]; swimming and twitching motility in <i>P.</i>                                                                           |

|  |  |                                                                                                                                                                                                                                                                                |
|--|--|--------------------------------------------------------------------------------------------------------------------------------------------------------------------------------------------------------------------------------------------------------------------------------|
|  |  | <i>aeruginosa</i> , increase in biofilm formation [86]; sensitivity to metronidazole and ciprofloxacin in <i>A. baylyi</i> [87]; <i>P. aeruginosa gshA</i> mutant attenuated in <i>C.elegans</i> infection [88]; <i>Salmonella gshA</i> mutant attenuated in murine model [89] |
|--|--|--------------------------------------------------------------------------------------------------------------------------------------------------------------------------------------------------------------------------------------------------------------------------------|

#### Outer membrane proteins

|                 |             |                                                                                                                                                                                                                                                                                                                                                        |
|-----------------|-------------|--------------------------------------------------------------------------------------------------------------------------------------------------------------------------------------------------------------------------------------------------------------------------------------------------------------------------------------------------------|
| <b>A1S_1970</b> |             | -                                                                                                                                                                                                                                                                                                                                                      |
| <b>A1S_2840</b> | <i>ompA</i> | <i>A. nosocomialis</i> surface-associated motility [26]; biofilm formation [94-96]; bacterial pathogenicity – Review [97]; virulence [11,103,104]; <i>A. baumannii</i> virulence in <i>C. elegans</i> [98]; <i>K. pneumoniae</i> virulence in <i>G. mellonella</i> [99]; antibiotic resistance [105]; pellicles in <i>A. baumannii</i> ATCC 17978 [43] |
| <b>A1S_3297</b> |             | general outer membrane proteins involved in pellicles in <i>A. baumannii</i> ATCC 17978 [43]                                                                                                                                                                                                                                                           |

#### 1,3-diaminopropane biosynthesis

|                 |            |                                                                       |
|-----------------|------------|-----------------------------------------------------------------------|
| <b>A1S_2453</b> | <i>ddc</i> | surface-associated motility and virulence in <i>A. baumannii</i> [33] |
| <b>A1S_2454</b> | <i>dat</i> |                                                                       |

#### Lipopeptide synthesis/ export

|                 |  |                                                                                                                                                                                                                                                                                                                                                                                                                     |
|-----------------|--|---------------------------------------------------------------------------------------------------------------------------------------------------------------------------------------------------------------------------------------------------------------------------------------------------------------------------------------------------------------------------------------------------------------------|
| <b>A1S_0113</b> |  | temperature dependent antibiotic resistance and surface motility in <i>A. baumannii</i> [146]; surface-associated motility in <i>A. baumannii</i> and <i>A. nosocomialis</i> [26,38]; pellicle biofilm formation in <i>A. baumannii</i> [38]; biofilm formation on abiotic surfaces in <i>A. baumannii</i> [107,106]; pellicles in <i>A. baumannii</i> ATCC 17978 [43]; imipenem-selected <i>A. baumannii</i> [108] |
| <b>A1S_0116</b> |  |                                                                                                                                                                                                                                                                                                                                                                                                                     |

#### DNA modification/repair/uptake

|                 |             |                                                                                                   |
|-----------------|-------------|---------------------------------------------------------------------------------------------------|
| <b>A1S_0222</b> | <i>aamA</i> | protein purification of <i>A. baumannii</i> AamA [110]; review of phenotypes caused by <i>dam</i> |
|-----------------|-------------|---------------------------------------------------------------------------------------------------|

|                 |              |                                                                                                                                                                                                                      |
|-----------------|--------------|----------------------------------------------------------------------------------------------------------------------------------------------------------------------------------------------------------------------|
|                 |              | mutants or <i>dam</i> overexpression [115]                                                                                                                                                                           |
| <b>A1S_2334</b> | <i>sahH</i>  | biofilm formation [147]                                                                                                                                                                                              |
| <b>A1S_2587</b> | <i>ruvA</i>  | -                                                                                                                                                                                                                    |
| <b>A1S_2610</b> | <i>comEC</i> | surface motility, twitching motility, virulence in <i>A. baumannii</i> [16]; twitching motility in <i>Thermus thermophilus</i> [116]; virulence and growth in <i>L. monocytogenes</i> [117]; biofilm formation [118] |

*Other*

|                 |             |                                                                                                                                                                                                                                                                                                                                                                                                                                                                                                                                                                                                                                                                                                   |
|-----------------|-------------|---------------------------------------------------------------------------------------------------------------------------------------------------------------------------------------------------------------------------------------------------------------------------------------------------------------------------------------------------------------------------------------------------------------------------------------------------------------------------------------------------------------------------------------------------------------------------------------------------------------------------------------------------------------------------------------------------|
| <b>A1S_0065</b> | <i>galE</i> | virulence in <i>A. baumannii</i> [52], <i>Bacillus anthracis</i> [128], <i>Streptococcus iniae</i> [129], <i>Leptosphaeria maculans</i> [130]; biofilm formation in <i>Sinorhizobium meliloti</i> [121], <i>Vibrio cholerae</i> [122], <i>Bacillus subtilis</i> [123], <i>Thermus thermophilus</i> [124], <i>Haemophilus parasuis</i> [125], <i>Porphyromonas gingivalis</i> [126], <i>A. baumannii</i> [76]; antibiotic resistance/susceptibility in <i>Porphyromonas gingivalis</i> [126], <i>Salmonella typhimurium</i> [131], <i>Salmonella typhi</i> [132]; <i>A. baumannii</i> biofilm ( <i>galU</i> , <i>galM</i> ) [127]; surface motility of <i>A. nosocomialis</i> ( <i>rmlB</i> ) [26] |
| <b>A1S_0806</b> |             | survival, growth and virulence of mycobacteria <i>bioA</i> [137,148-150]                                                                                                                                                                                                                                                                                                                                                                                                                                                                                                                                                                                                                          |
| <b>A1S_1055</b> |             | lytic transglycosylase (A1S_3027) in <i>A. nosocomialis</i> motility [26]                                                                                                                                                                                                                                                                                                                                                                                                                                                                                                                                                                                                                         |
| <b>A1S_2761</b> | <i>prpF</i> | pellicles in <i>A. baumannii</i> ATCC 17978 [43]                                                                                                                                                                                                                                                                                                                                                                                                                                                                                                                                                                                                                                                  |
| <b>A1S_3026</b> |             | reviews of T2 Family Ribonucleases [151,152]; abiotic surface colonization in <i>A. baumannii</i> [34]; colistin resistance in <i>A. baumannii</i> [138]                                                                                                                                                                                                                                                                                                                                                                                                                                                                                                                                          |
| <b>A1S_3129</b> | <i>astB</i> | virulence in <i>A. baumannii</i> [52]; pellicles in <i>A. baumannii</i> ATCC 17978 [43]                                                                                                                                                                                                                                                                                                                                                                                                                                                                                                                                                                                                           |
